# Supplementary material
Source: PubMed Central journal article supplement (PMC8446310)
Supplement: NIHMS1719705-supplement-Supplementary_Information.pdf [file NIHMS1719705-supplement-Supplementary_Information.pdf]

## Supplementary Notes

### Summary of previously published reports using aTFs to activate enhancers or other distantly located sequences

| aTF type                                                                     | Number of gRNAs per target locus | Name of Enhancer/distal sequence                                                   | Distance from TSS to Enhancer/distal sequence | Target gene name   | Cell type                   | native expression of target genes               | Mean fold-activation by targeting enhancers (mRNA)                                            | Mean fold-activation by targeting promoters (mRNA) | Chromatin status (Target enhancer) | Chromatin status (Target gene promoter) | Reference (paper)              |
|------------------------------------------------------------------------------|----------------------------------|------------------------------------------------------------------------------------|-----------------------------------------------|--------------------|-----------------------------|-------------------------------------------------|-----------------------------------------------------------------------------------------------|----------------------------------------------------|------------------------------------|-----------------------------------------|--------------------------------|
| dCas9-p300                                                                   | 4                                | MYOD1 CE enhancer                                                                  | 20kb                                          | MYOD1              | HEK293T                     | Lowly expressed                                 | -4                                                                                            | ~50                                                | Closed, no H3K27Ac                 | Open, no H3K27Ac                        | PMID: 25849900 (Hilton et al.) |
|                                                                              | 4                                | MYOD1 DRB enhancer                                                                 | 5kb                                           | MYOD1              | HEK293T                     | Lowly expressed                                 | -18                                                                                           |                                                    | Open, no H3K27Ac                   | Open, no H3K27Ac                        |                                |
|                                                                              | 6                                | Oct 4 DE enhancer                                                                  | 2.25kb                                        | POU5F1(Oct4)       | HEK293T                     | Lowly expressed                                 | -8                                                                                            |                                                    | Closed, no H3K27Ac                 | Closed, no H3K27Ac                      |                                |
|                                                                              | 6                                | Oct 4 FE enhancer                                                                  | 1.25kb                                        | POU5F1(Oct4)       | HEK293T                     | Lowly expressed                                 | -30                                                                                           |                                                    | Closed, no H3K27Ac                 | Closed, no H3K27Ac                      |                                |
|                                                                              | 4                                | HS2                                                                                | 5kb, 30kb, 46kb, 50kb                         | HBE, HBG, HBD, HBB | HEK293T                     | Lowly expressed                                 | 15.5, 269, 7.5, 1                                                                             |                                                    | Open, no H3K27Ac                   | Closed, no H3K27Ac                      |                                |
|                                                                              | 1                                | MYOD1 CE enhancer                                                                  | 20kb                                          | MYOD1              | HEK293T                     | Lowly expressed                                 | 4 individual gRNAs showed less than 5-fold activation                                         |                                                    | Closed, no H3K27Ac                 | Open, no H3K27Ac                        |                                |
|                                                                              | 1                                | MYOD1 DRB enhancer                                                                 | 5kb                                           | MYOD1              | HEK293T                     | Lowly expressed                                 | 3 individual gRNAs showed less than 5-fold activation and one gRNA showed ~15-fold activation | Open, no H3K27Ac                                   | Open, no H3K27Ac                   |                                         |                                |
|                                                                              | 1                                | Oct 4 DE enhancer                                                                  | 2.25kb                                        | POU5F1(Oct4)       | HEK293T                     | Lowly expressed                                 | All 6 individual gRNAs showed less than 3-fold activation                                     | Closed, no H3K27Ac                                 | Closed, no H3K27Ac                 |                                         |                                |
|                                                                              | 1                                | Oct 4 FE enhancer                                                                  | 1.25kb                                        | POU5F1(Oct4)       | HEK293T                     | Lowly expressed                                 | 5 gRNAs showed less than 10-fold activation and one gRNA showed ~20 fold                      | Closed, no H3K27Ac                                 | Closed, no H3K27Ac                 |                                         |                                |
|                                                                              | 1                                | HS2                                                                                | 10kb, 30kb                                    | HBE, HBG           | HEK293T                     | Lowly expressed                                 | All 4 individual gRNAs showed less than 5-fold activation for HBE                             | Open, no H3K27Ac                                   | Closed, no H3K27Ac                 |                                         |                                |
| dCas9-VP64                                                                   | 4                                | MYOD1 CE enhancer                                                                  | 20kb                                          | MYOD1              | HEK293T                     | Lowly expressed                                 | None                                                                                          | ~25                                                | Closed, no H3K27Ac                 | Open, no H3K27Ac                        |                                |
|                                                                              | 4                                | MYOD1 DRB enhancer                                                                 | 5kb                                           | MYOD1              | HEK293T                     | Lowly expressed                                 | None                                                                                          |                                                    | Open, no H3K27Ac                   | Open, no H3K27Ac                        |                                |
|                                                                              | 6                                | Oct 4 DE enhancer                                                                  | 2.25kb                                        | POU5F1(Oct4)       | HEK293T                     | Lowly expressed                                 | None                                                                                          |                                                    | Closed, no H3K27Ac                 | Closed, no H3K27Ac                      |                                |
|                                                                              | 6                                | Oct 4 FE enhancer                                                                  | 1.25kb                                        | POU5F1(Oct4)       | HEK293T                     | Lowly expressed                                 | None                                                                                          |                                                    | Closed, no H3K27Ac                 | Closed, no H3K27Ac                      |                                |
|                                                                              | 4                                | HS2                                                                                | 5kb, 30kb, 46kb, 50kb                         | HBE, HBG, HBD, HBB | HEK293T                     | Lowly expressed                                 | None                                                                                          |                                                    | Open, no H3K27Ac                   | Closed, no H3K27Ac                      |                                |
|                                                                              | 1                                | Oct4 enhancer                                                                      | 2.4kb                                         | POU5F1(Oct4)       | Mouse embryonic fibroblasts |                                                 | -3                                                                                            |                                                    |                                    |                                         |                                |
| dCas9-VP64                                                                   | 1                                | Nanog enhancer                                                                     | 5kb                                           | Nanog              | Mouse embryonic fibroblasts |                                                 | -2.5                                                                                          |                                                    |                                    | PMID: 25223790 (Gao et al.)             |                                |
|                                                                              | 1                                | Oct4 enhancer                                                                      | 2.4kb                                         | POU5F1(Oct4)       | Mouse embryonic fibroblasts |                                                 | -3                                                                                            |                                                    |                                    |                                         |                                |
| dCas9-VP160                                                                  | 1                                | Nanog enhancer                                                                     | 5kb                                           | Nanog              | Mouse embryonic fibroblasts |                                                 | -2.5                                                                                          |                                                    |                                    |                                         |                                |
| TALE-VP64                                                                    | 1                                | Oct4 enhancer                                                                      | 2.4kb                                         | POU5F1(Oct4)       | Mouse embryonic fibroblasts |                                                 | -5                                                                                            |                                                    |                                    |                                         |                                |
| dCas9-p300                                                                   | 4                                | IE1                                                                                | 4kb                                           | IL1RN              | HEK293T                     | Lowly expressed                                 | -80                                                                                           | >10,000                                            | Closed, no H3K27Ac                 | Closed, no H3K27Ac                      | PMID: 30098338 (Kuscu et al.)  |
|                                                                              | 4                                | IE2                                                                                | 8kb                                           | IL1RN              | HEK293T                     | Lowly expressed                                 | -30                                                                                           |                                                    | Closed, no H3K27Ac                 | Closed, no H3K27Ac                      |                                |
|                                                                              | 4                                | IE3                                                                                | 24kb                                          | IL1RN              | HEK293T                     | Lowly expressed                                 | -3                                                                                            |                                                    | Closed, no H3K27Ac                 | Closed, no H3K27Ac                      |                                |
|                                                                              | 4                                | IE1                                                                                | 4kb                                           | IL1RN              | K562                        | Not expressed                                   | -11                                                                                           |                                                    | Closed, no H3K27Ac                 | Closed, no H3K27Ac                      |                                |
|                                                                              | 4                                | IE2                                                                                | 8kb                                           | IL1RN              | K562                        | Not expressed                                   | -45                                                                                           |                                                    | Closed, no H3K27Ac                 | Closed, no H3K27Ac                      |                                |
|                                                                              | 4                                | IE3                                                                                | 24kb                                          | IL1RN              | K562                        | Not expressed                                   | -22                                                                                           |                                                    | Closed, no H3K27Ac                 | Closed, no H3K27Ac                      |                                |
|                                                                              | 4                                | IE1                                                                                | 4kb                                           | MyoD1              | HEK293T                     | Lowly expressed                                 | -8                                                                                            |                                                    | Closed, no H3K27Ac                 | Open, no H3K27Ac                        |                                |
|                                                                              | 4                                | IE2                                                                                | 8kb                                           | MyoD1              | HEK293T                     | Lowly expressed                                 | -6                                                                                            |                                                    | Closed, no H3K27Ac                 | Open, no H3K27Ac                        |                                |
|                                                                              | 4                                | IE3                                                                                | 24kb                                          | MyoD1              | HEK293T                     | Lowly expressed                                 | -4                                                                                            |                                                    | Closed, no H3K27Ac                 | Open, no H3K27Ac                        |                                |
|                                                                              | 4                                | IE1                                                                                | 4kb                                           | POU5F1(Oct4)       | HEK293T                     | Lowly expressed                                 | -5                                                                                            |                                                    | Closed, no H3K27Ac                 | Closed, no H3K27Ac                      |                                |
|                                                                              | 4                                | IE2                                                                                | 8kb                                           | POU5F1(Oct4)       | HEK293T                     | Lowly expressed                                 | -3                                                                                            |                                                    | Closed, no H3K27Ac                 | Closed, no H3K27Ac                      |                                |
|                                                                              | 4                                | IE3                                                                                | 24kb                                          | POU5F1(Oct4)       | HEK293T                     | Lowly expressed                                 | -3                                                                                            |                                                    | Closed, no H3K27Ac                 | Closed, no H3K27Ac                      |                                |
| dCas9-VP64 + MCP-p300 (enCRISPRa-VP) or dCas9-p300 + MCP-VP64 (enCRISPRa-PV) | the sgRNA with two M2 hairpins   | MYOD1 DRB enhancer                                                                 | 5kb                                           | MYOD1              | HEK293T                     | Lowly expressed                                 | -30                                                                                           | ~7                                                 | Open, no H3K27Ac                   | Open, no H3K27Ac                        | PMID: 28369033 (Klann et al.)  |
|                                                                              |                                  | HS2                                                                                | 5kb                                           | HBE                | HEK293T                     | Lowly expressed                                 | 23.6                                                                                          |                                                    | Open, no H3K27Ac                   | Closed, no H3K27Ac                      |                                |
|                                                                              |                                  | HS2                                                                                | 30kb                                          | HBB                | HEK293T                     | Lowly expressed                                 | 40.6                                                                                          |                                                    | Open, no H3K27Ac                   | Closed, no H3K27Ac                      |                                |
|                                                                              |                                  | HS2                                                                                | 50kb                                          | HBB                | HEK293T                     | Lowly expressed                                 | 13                                                                                            |                                                    | Open, no H3K27Ac                   | Closed, no H3K27Ac                      |                                |
| dCas9-p300                                                                   | 1                                | gRNA library targeting the 4 Mb region around HER2                                 | various                                       | HER2               | HEK293T                     | Expressed                                       | less than ~3                                                                                  | Open                                               | Open, H3K27Ac positive             | PMID: 28369033 (Klann et al.)           |                                |
| dCas9-VP64                                                                   | 1                                | regions identified from H3K27Ac HiChIP                                             | various                                       | CD69               | Jurkat                      | Lowly expressed                                 | -15                                                                                           | Open, H3K27Ac positive                             | Open, H3K27Ac positive             | PMID: 28945252 (Mumbach et al.)         |                                |
| dCas9-VP64                                                                   | 1                                | gRNA libraries targeting 135kb and 178 kb at the IL2RA and CD69 loci, respectively | various                                       | IL2RA or CD69      | Jurkat                      | not expressed and lowly expressed, respectively | *N/A                                                                                          | Open, H3K27Ac positive                             | Open, H3K27Ac positive             | PMID: 28854172 (Simeonov et al.)        |                                |

| *protein expression measured by flow cytometry | Source     |
|------------------------------------------------|------------|
| HEK293T RNA                                    | GSM3443142 |
| Jurkat RNA expression                          | GSM923424  |
| K562 RNA expression                            | GSM758577  |
| HEK293T DNase-seq                              | GSM1008573 |
| K562 DNase-seq                                 | GSM816655  |
| HEK293T H3K27Ac                                | GSM1249889 |
| K562 H3K27Ac                                   | SM733656   |

### **Impact of heterotopic enhancer activation on promoters of *IL2RA*, *CD69*, and *MYOD1***

Previously published work has shown that targeting of more than one aTF to a promoter can yield synergistic increases in human gene transcription(1). Therefore, we compared the magnitude of synergistic activation resulting from concurrent enhancer-promoter aTF targeting with that observed by targeting two aTFs to only the promoter. As expected, we found that co-expression of various pairs of promoter-targeted gRNAs with the bi-partite p65 aTF led to synergistic increases in gene transcription at the *IL2RA*, *CD69*, and *MYOD1* promoters (**Supplementary Figs. 1a -1b**). For all three genes, the ranges of fold-activation values observed with aTFs targeted using two promoter gRNAs were more effective in at least half the cases we tested than those obtained using two gRNAs concurrently targeted to enhancer and promoter sites (**Supplementary Fig. 1b**). However, addition of a third enhancer-targeted gRNA to the two promoter-targeted gRNAs led to even greater increases in gene transcription, with mean activation values reaching as high as 1176-fold, 429-fold, and 894-fold for the *IL2RA*, *CD69*, and *MYOD1* genes, respectively (**Supplementary Fig. 1b**). The impact of adding an enhancer-bound aTF was strongest for the *IL2RA* and *MYOD1* genes but still measurable and significant for the *CD69* gene (**Supplementary Fig. 1b**). Interestingly, for the *IL2RA* and *CD69* genes, the magnitude of the effect of adding an enhancer-bound aTF on gene activation was inversely correlated with the magnitude of the fold-activation induced by the promoter-bound aTF(s) (**Supplementary Fig. 1c**).

### **Transcriptome-wide RNA-seq specificity analyses with activation of promoter, enhancer, or both by bi-partite p65 aTF at *CD69*, *IL2RA*, and *MYOD1* loci in HEK293 cells**

To evaluate the specificity of transcriptional activation with the simultaneous enhancer-promoter targeting strategy, we performed transcriptome-wide analysis using RNA-seq. For these experiments, we chose the best performing combination of enhancer/promoter gRNAs for the *IL2RA*, *CD69* and *MYOD1* genes in HEK293 cells (**Figs. 1c - 1e**) and performed RNA-seq in HEK293 cells in which we

expressed the bi-partite p65 aTF with the promoter gRNA only, the enhancer gRNA only, and both gRNAs. For all three target genes, we did not observe greater than two-fold activation of any neighboring expressed genes (arbitrarily defined as all those within +/-200 kb of the target gene TSS with an FPKM value >1) with the promoter- or enhancer-targeted gRNAs each alone or together (**Supplementary Table 5**). At a transcriptome-wide level, we did not observe significant activation of any off-target gene with any of the gRNAs targeted to activate the *CD69* gene but did observe significant repression of nine genes (presumably due to either an indirect downstream effect of activating *CD69* or a direct repressive effect of the aTF) (**Supplementary Fig. 2a, Supplementary Table 6**). For the *IL2RA* gene, we observed significant off-target activation of 12 genes and repression of 7 genes with the combined promoter- and enhancer-targeted gRNAs (**Supplementary Fig. 2b**). Six of the 12 upregulated genes were also significantly activated with the promoter-targeted gRNA alone as off-targets, making it difficult to distinguish whether these changes were due to a direct aTF off-target effect or an indirect downstream consequence of activating the *IL2RA* gene; two of the 12 genes were significantly activated with the enhancer-targeted gRNA alone, consistent with an off-target activation effect due to this gRNA (**Supplementary Fig. 2b, Supplementary Table 6**). For some of these off-target genes, we were able to identify potential binding sites with perfectly matched sequences within the 7 bp of seed region (positions 1 to 7) of the gRNA spacer, previously shown to be sufficient for binding by catalytically inactive SpCas9(2) (**Supplementary Fig. 2b, Supplementary Table 7**). For the *MYOD1* gene, we observed a very large number of off-target genes (126) transcriptome-wide that were significantly activated and 15 genes that were significantly repressed with individual gRNAs or the combined promoter- and enhancer-targeted gRNAs (**Supplementary Fig. 2c, Supplementary Table 6**). Although some of these off-target gene expression increases may be due to off-target binding of the aTF in conjunction with either the promoter- or enhancer-targeted gRNA (**Supplementary Table 7**), the higher number of genes altered in this case might also be due to indirect effects of increased expression of *MYOD1*, which encodes a transcription factor that can upregulate (or downregulate) muscle-specific gene expression(3). Consistent with this, Gene Ontology (GO) analysis (<http://pantherdb.org>) revealed that many of the off-target genes we identified are significantly enriched in muscle contraction processes or are previously known targets

of MYOD1-mediated regulation (**Supplementary Fig. 2c; Supplementary Table 8**). Taken together, we conclude that the transcriptome-wide specificity of activation with concurrent enhancer-promoter aTF targeting is dependent on the design of the gRNAs and the functional effects of the target genes themselves.

#### **Using orthogonal dCas9- and dCas12a-based fusions to test enhancer-promoter targeting with direct fusion VP64 aTFs and aTFs with heterologous activation domains or no activation domain**

Because the direct VP64 fusion aTF did not work in HEK293 cells, we also tested whether pairing it with an aTF harboring a different activation domain might enable it to activate the *HBB* gene from the LCR. To do this, we constructed a series of aTFs based on catalytically inactive Cas12a nuclease from *Lachnospiraceae bacterium* (**dCas12a**)(4) (instead of dCas9) that harbor various activation domains. We targeted these dCas12a-based aTFs to the LCR HS2 enhancer sequence and a dCas9-VP64 aTF to the *HBB* promoter and *vice versa* (**Supplementary Fig. 3**). However, neither configuration resulted in significantly increased activation of the *HBB* gene relative to aTF targeted to only the promoter in HEK293 cells (**Supplementary Fig. 3**). We also used this dCas9/dCas12a system to demonstrate that promoter binding of dCas9 or dCas12a only (i.e., lacking an activation domain) is insufficient to result in robust enhancer activation by a direct fusion VPR aTF in HEK293 cells (**Supplementary Fig. 4**).

#### **Testing activation when concurrently targeting aTFs to a target gene promoter and distal regions within or outside the same TAD**

We tested a series of gRNAs for their abilities to activate either the *MYOD1* or *HBB* promoter in K562 cells, with these gRNAs targeting various distally located sites positioned in the same TAD as the target gene or in neighboring TADs (**Supplementary Figs. 6a and 6c**) (using TAD boundaries defined by previously published studies(5)). For these experiments, we co-expressed each of these different

gRNAs together with a promoter-targeted gRNA and the bi-partite p65 aTF. Surprisingly, we obtained different results for the two genes: for *MYOD1*, we were able to induce robust activation only when targeting the known CE enhancer site within the same TAD (**Supplementary Fig. 6b**); by contrast, for *HBB*, we observed robust activation from sites both within the same TAD as well as in neighboring TADs (**Supplementary Fig. 6d**). Interestingly, while our analysis of previously published Hi-C data from K562 cells(5) revealed similar normalized 3D interaction frequencies around the *HBB* and *MYOD1* loci (**Supplementary Fig. 6e-6f**), we noted that the two loci appear to be located in spatially distinct nuclear subcompartments. An examination of the Spatial Position Inference of the Nuclear genome (**SPIN**) states of the two loci(6) found that the *HBB* TSS is located within a ~600 Kb interior active compartment of the nucleus, while *MYOD1* TSS exists within ~700 Kb interior repressed compartment (**Supplementary Figs. 6a and 6c**), suggesting that perhaps the *HBB* locus might be predisposed to have higher transcriptional activity than the *MYOD1* locus.

## SUPPLEMENTARY FIGURES

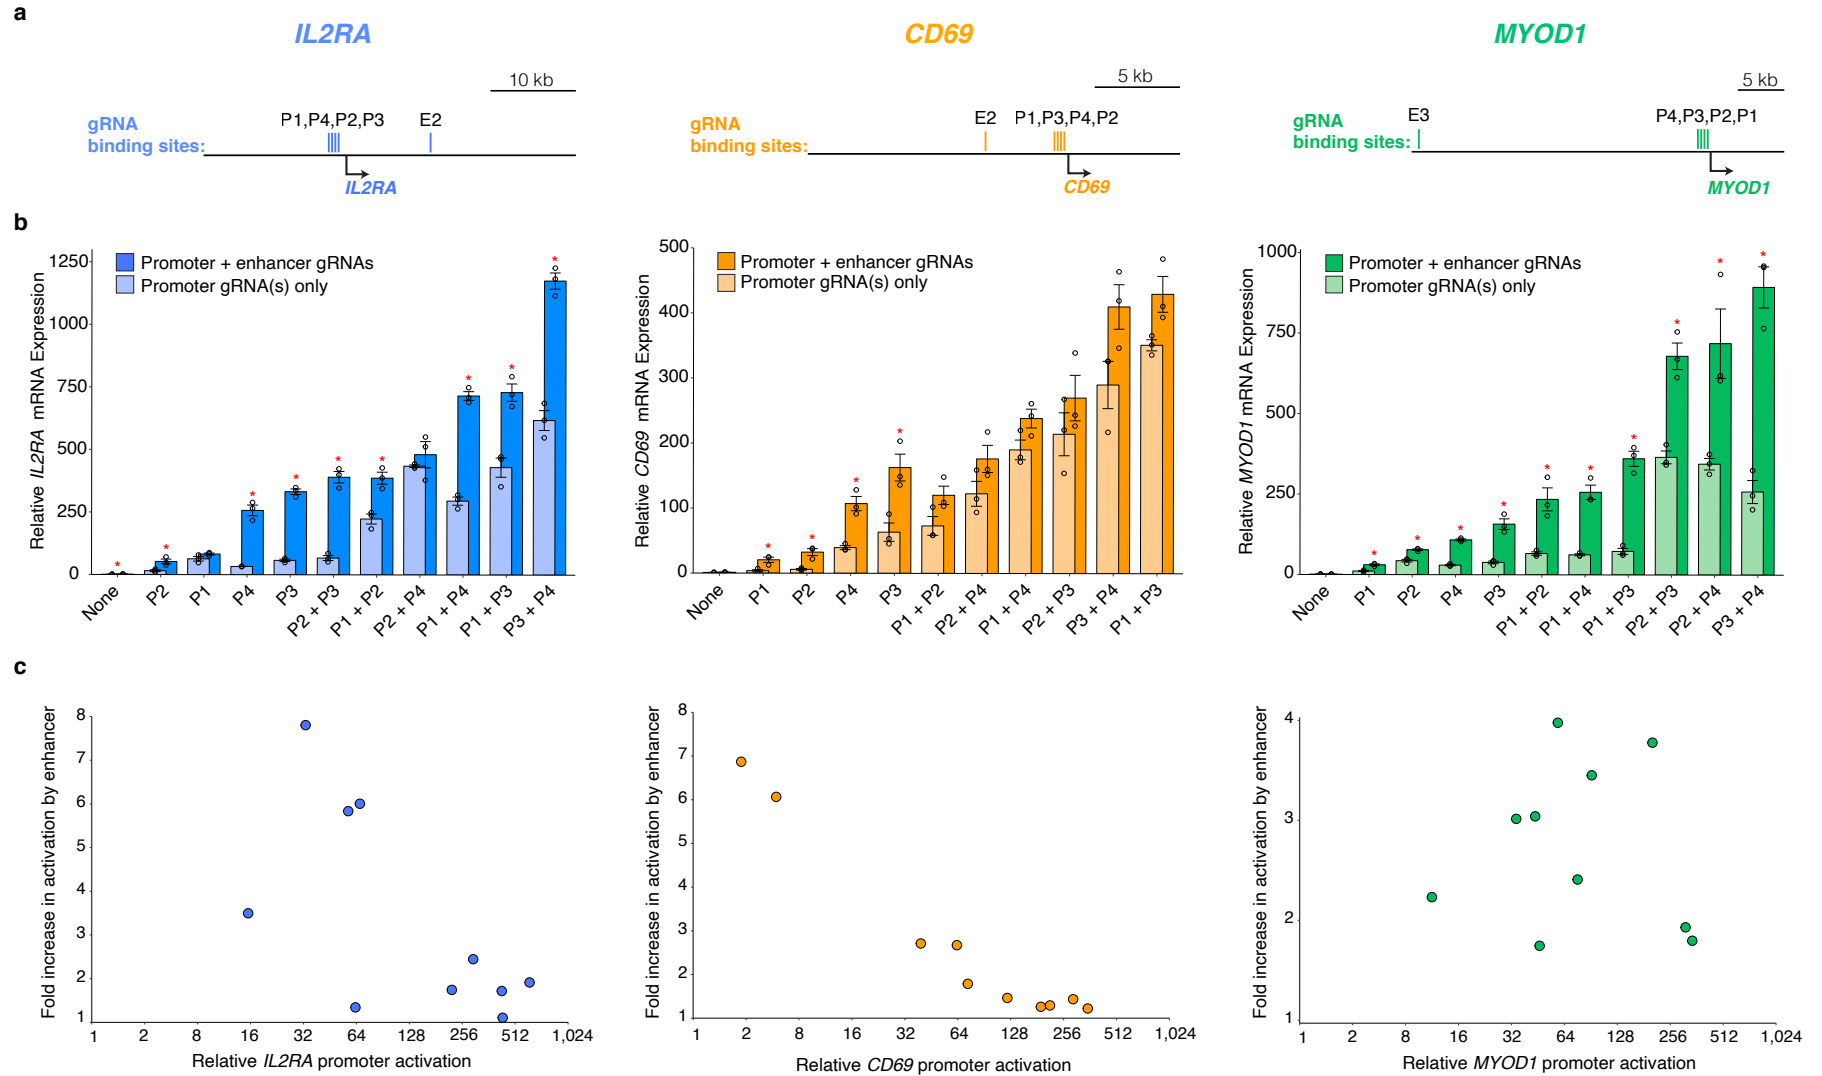

**Supplementary Figure 1. Impact of heterotopic enhancer activation on promoters of *IL2RA*, *CD69*, and *MYOD1*.**

**a**, Schematics illustrating genomic locations of promoter-targeting gRNAs for *IL2RA*, *CD69*, and *MYOD1* and the optimal enhancer-targeting gRNA for each gene in HEK293 cells (from **Fig. 1c-e**).

**b**, mRNA expression levels of the endogenous *IL2RA*, *CD69* and *MYOD1* genes in HEK293 cells determined by RT-qPCR in the presence of the bi-partite p65 aTF and various combinations of the promoter- and enhancer-targeting gRNAs shown in **a**. A non-targeting gRNA was used for the control samples (labelled as None). Open circles indicate biological replicates (n=3), bars the mean of replicates and error bars the s.e.m. \* indicates significantly different from their matched sample lacking the enhancer-targeting gRNA ( $p < 0.05$ ) (Student's t-test, two-tailed test assuming equal variance). The exact p-values are in Supplementary Data.

**c**, Increase in gene expression by heterotopic enhancer activation of the activated promoters of *IL2RA*, *CD69* and *MYOD1* genes. X-axis: the levels of promoter activation (fold-change in gene expression compared to the negative control with non-targeting gRNA) of target genes by bi-partite p65 aTF and gRNAs that target promoters only. Y-axis: the effect of heterotopic enhancer activation by bi-partite p65 aTF (fold-difference in gene expression between promoter with enhancer activation and promoter activation alone).





**Supplementary Figure 2. Transcriptomic analyses after activation of promoter, enhancer, or both by bi-partite p65 aTF at *CD69*, *IL2RA*, and *MYOD1* loci in HEK293 cells.**

**a-c**, Heat maps of the genes that were differentially expressed relative to control (log<sub>2</sub> fold change) using the bi-partite p65 aTF (P: promoter gRNA transfected; E: enhancer gRNA transfected; E + P: enhancer and promoter gRNA co-transfected), ranked by fold change of E + P over control. All the genes that were significantly up- or down-regulated (adjusted p-value < 0.05, p-values (attained by the Wald test) are corrected for multiple testing using the Benjamini and Hochberg method) by 4-fold or more are listed. Red-colored and blue-colored genes have perfectly matched sequences within the 7 bp of seed region (positions 1 to 7) of the promoter-targeted gRNA spacer and enhancer-targeted gRNAs spacer, respectively.

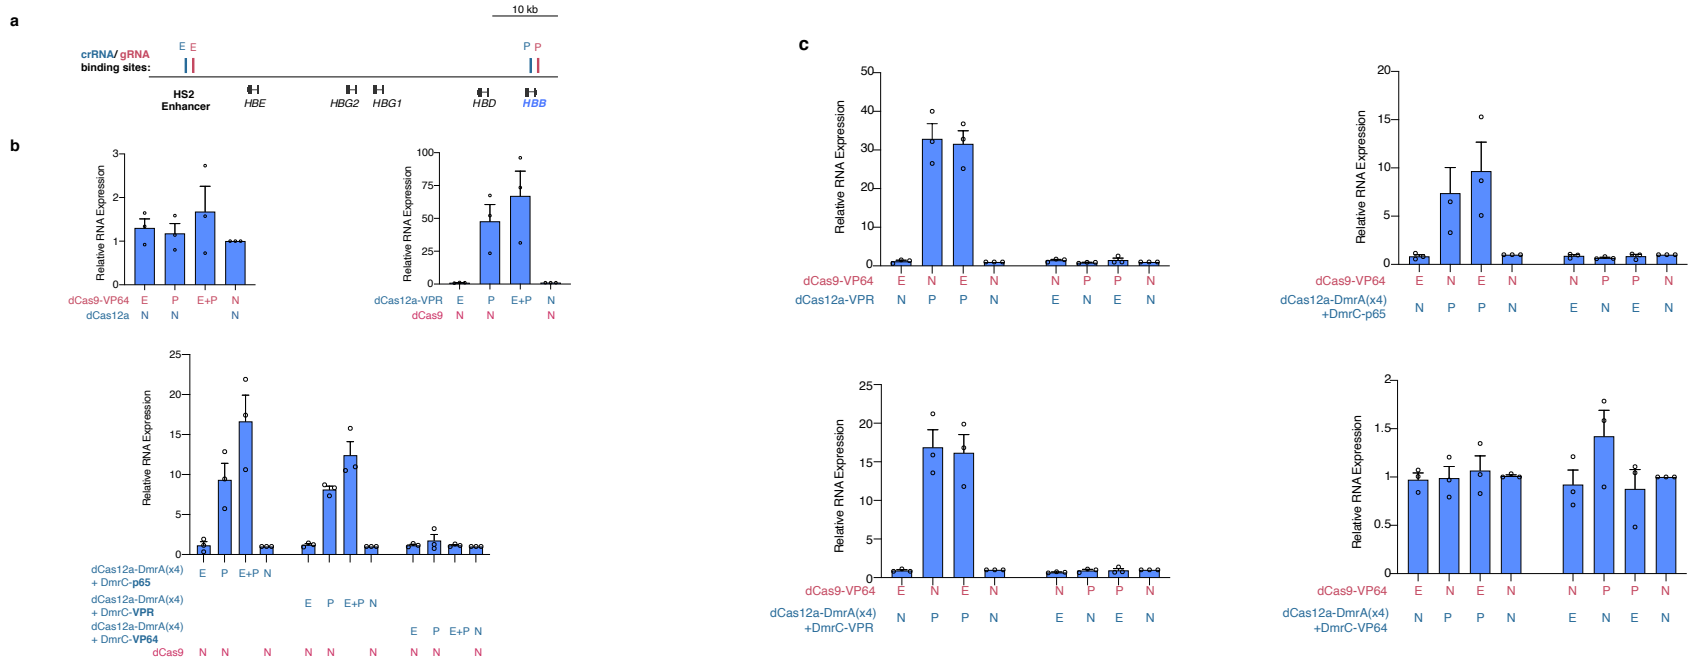

**Supplementary Figure 3. Pairing dCas9-VP64 with dCas12a-based aTFs for concurrent targeting of LCR and *HBB* promoter in HEK293 cells.**

**a**, Genomic locations of gRNAs or crRNAs targeting the LCR HS2 region (E) and the promoter regions of *HBB* (P).

**b**, mRNA expression levels of the endogenous *HBB* genes in HEK293 cells in the presence of 1) dCas9-VP64 and dCas12a (serves as a loading control) with Cas9 gRNAs targeting *HBB* promoter, LCR HS2 enhancer, both or none (top left panel) dCas12a-based aTFs and dCas9 (serves as a loading control) with Cas12a crRNAs targeting *HBB* promoter, LCR HS2 enhancer, both or none (top right and bottom panel). N indicates non-targeting gRNAs or crRNA. Open circles indicate biological replicates (n=3), bars the mean of replicates and error bars the s.e.m.

**c**, mRNA expression levels of the endogenous *HBB* genes when dCas9-VP64 is targeted to HS2 LCR enhancer and dCas12a-based aTF is targeted to *HBB* promoter or vice versa. N indicates non-targeting gRNAs or crRNA. Open circles indicate biological replicates (n=3), bars the mean of replicates and error bars the s.e.m.

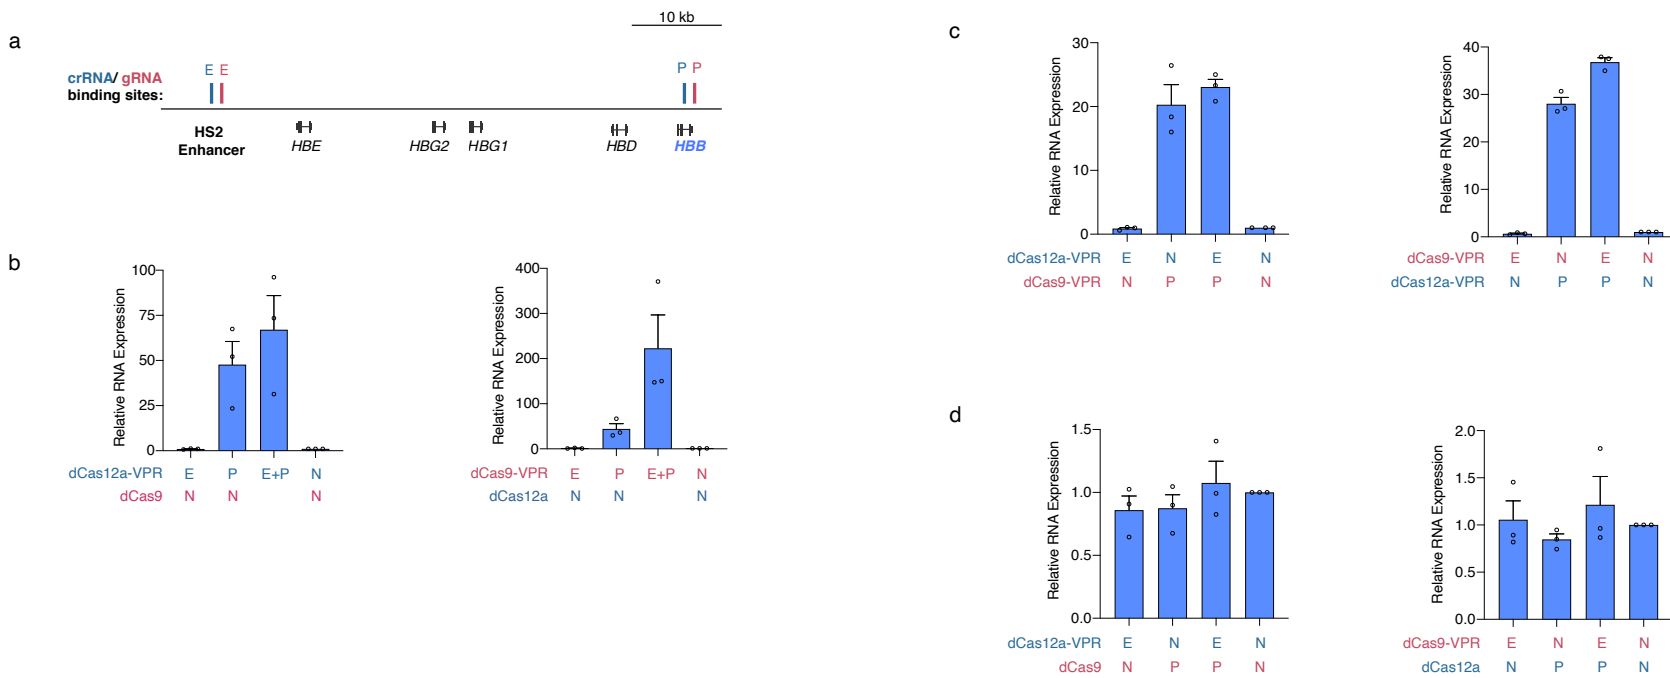

**Supplementary Figure 4. Lack of heterotopic enhancer activation when promoter is targeted by aTF without activation domains**

**a**, Genomic locations of gRNAs or crRNAs targeting the LCR HS2 region (E) and the promoter regions of *HBB* (P).

**b**, mRNA expression levels of the endogenous *HBB* genes in HEK293 cells in the presence of 1) dCas12a-VPR and dCas9 with Cas12a crRNAs targeting *HBB* promoter, LCR HS2 enhancer, both or none (left panel); 2) dCas9-VPR and dCas9 with Cas9 gRNAs targeting *HBB* promoter, LCR HS2 enhancer, both or none (right panel). Open circles indicate biological replicates (n=3), bars the mean of replicates and error bars the s.e.m.

**c**, mRNA expression levels of the endogenous *HBB* genes when dCas12a-VPR is targeted to LCR HS2 enhancer and dCas9-VPR is targeted to *HBB* promoter or vice versa. Open circles indicate biological replicates (n=3), bars the mean of replicates and error bars the s.e.m.

**d**, mRNA expression levels of the endogenous *HBB* genes 1) when dCas12a-VPR is targeted to enhancer and dCas9 is targeted to *HBB* promoter and 2) when dCas9-VPR is targeted to enhancer and dCas12a is targeted to *HBB* promoter. Open circles indicate biological replicates (n=3), bars the mean of replicates and error bars the s.e.m.

# IL2RA

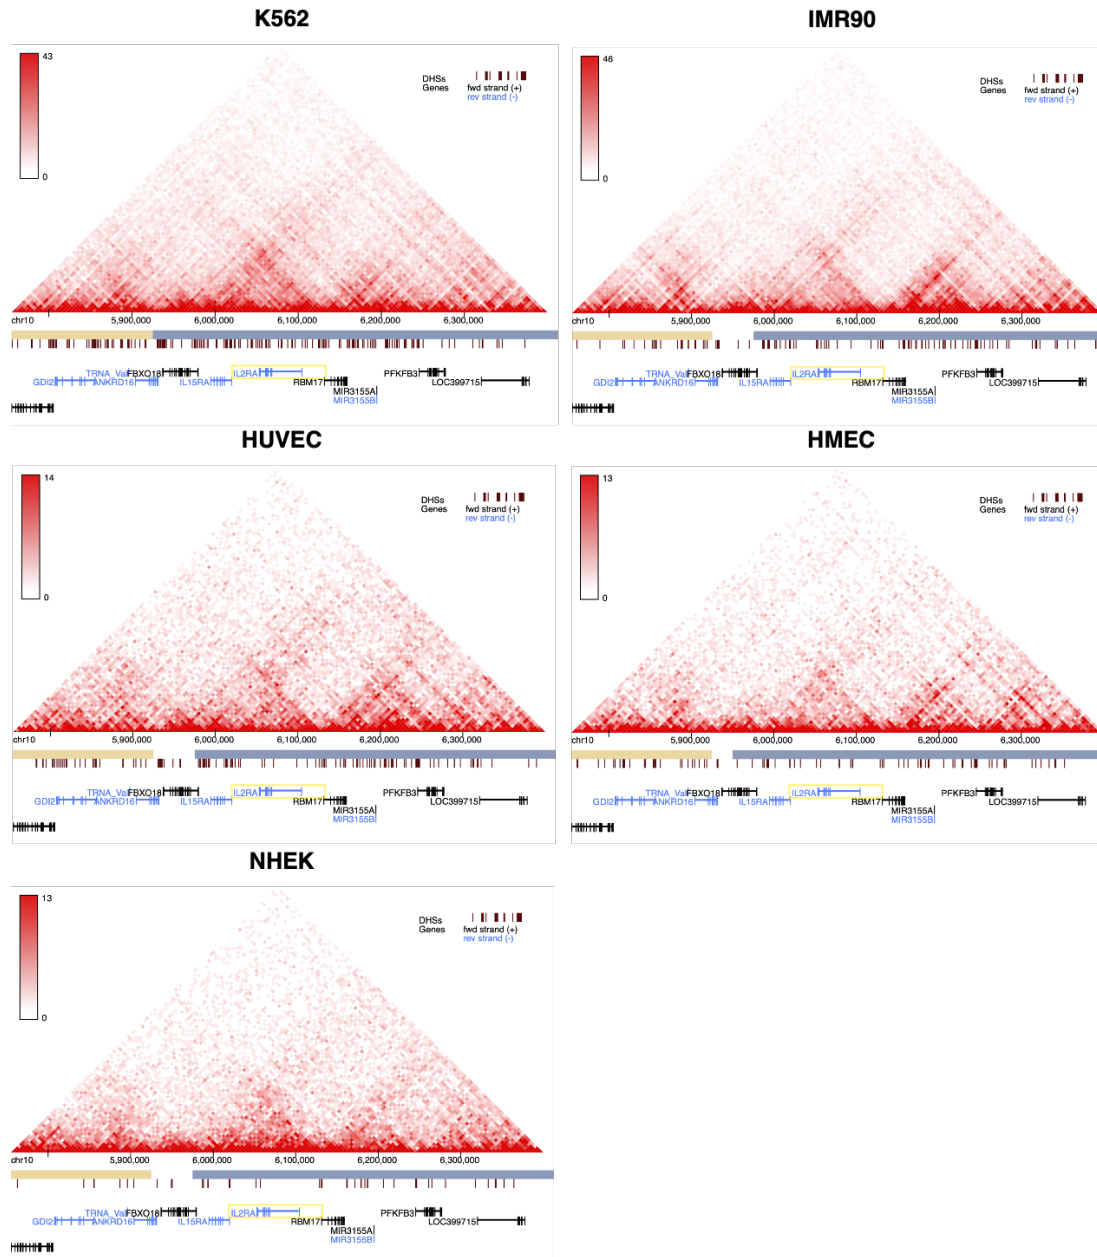

# CD69

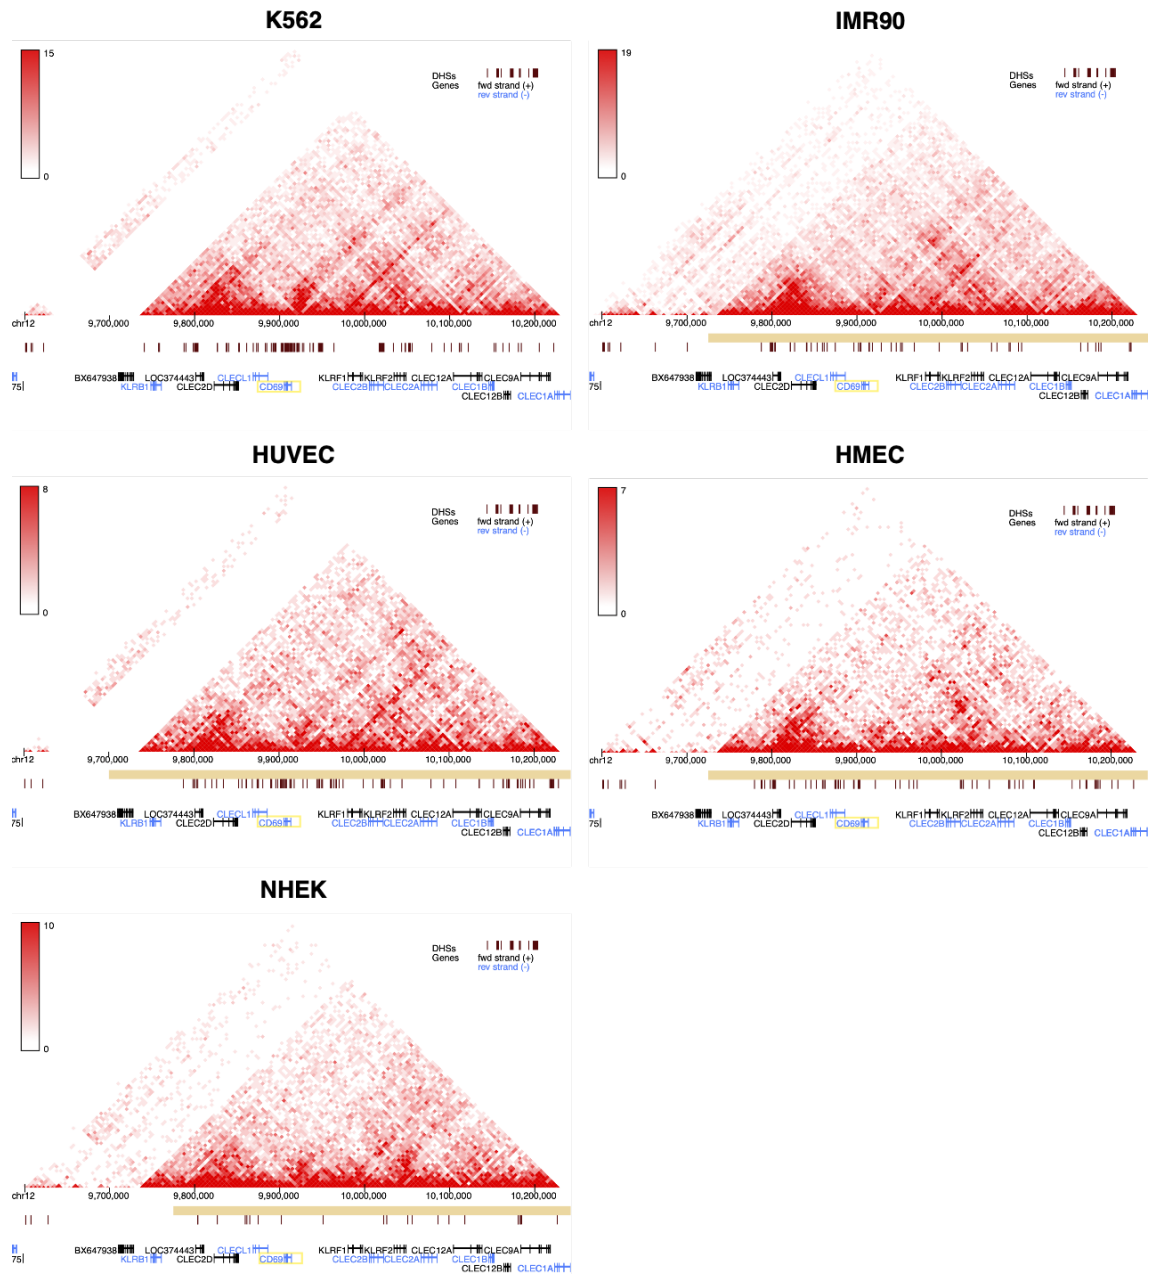

# MYOD1

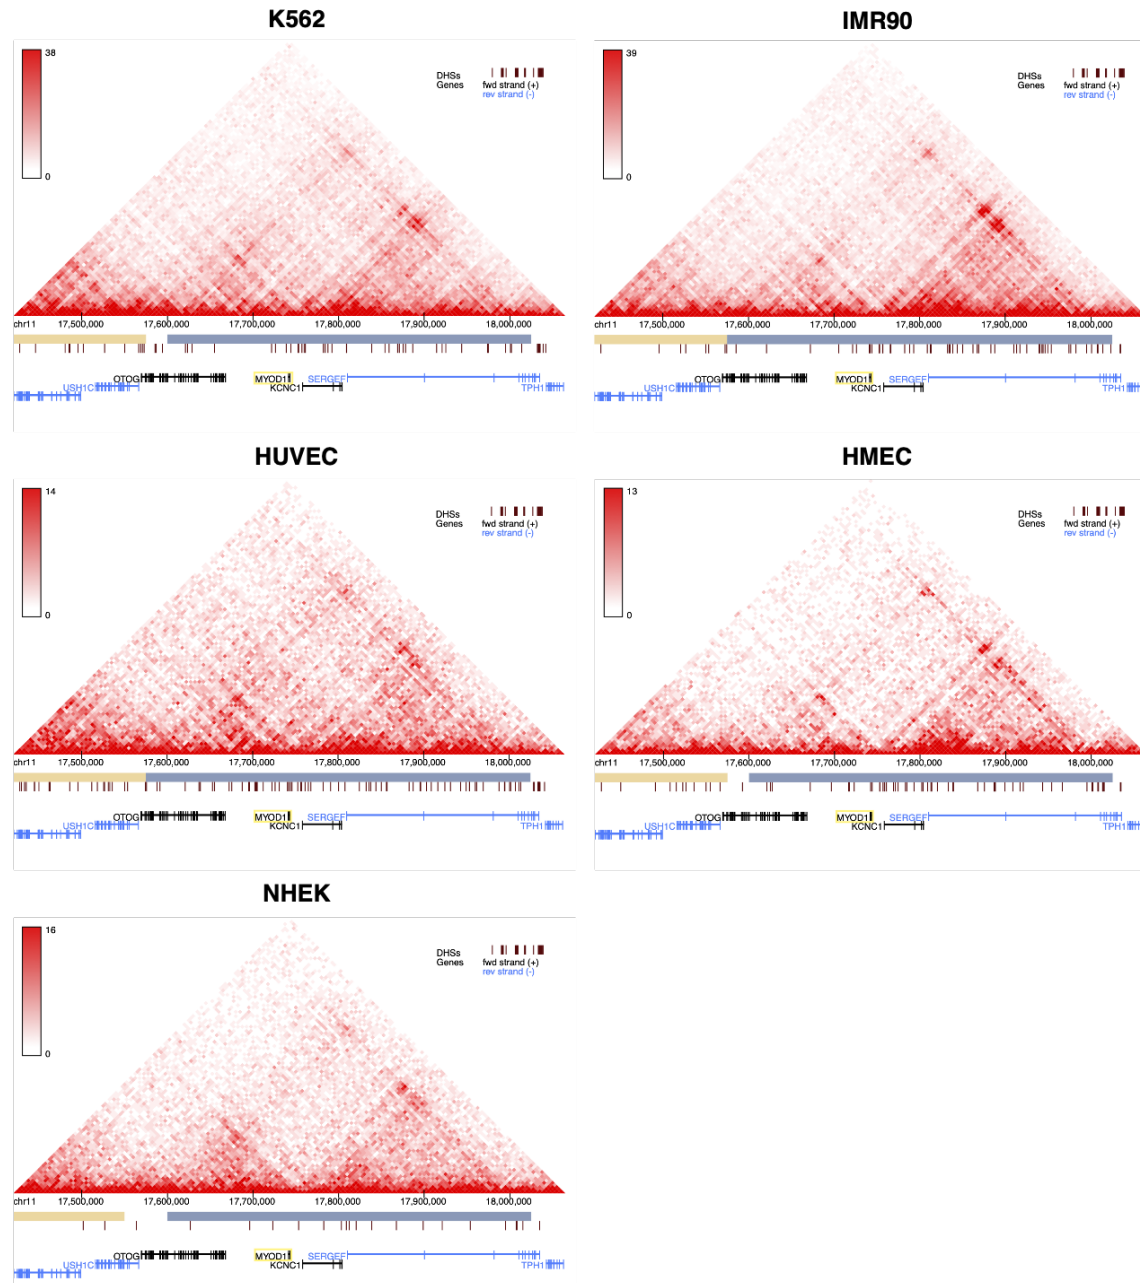



**Supplementary Figure 5. TADs centered on target loci from different cell types.**

The individual TADs where *IL2RA*, *CD69*, *MYOD1*, and *APOC3* loci are located, are maintained across various cell types for which these data are available, including the K562 cell line used in this study. The triangle heat maps for TADs were obtained from 3D genome browser.

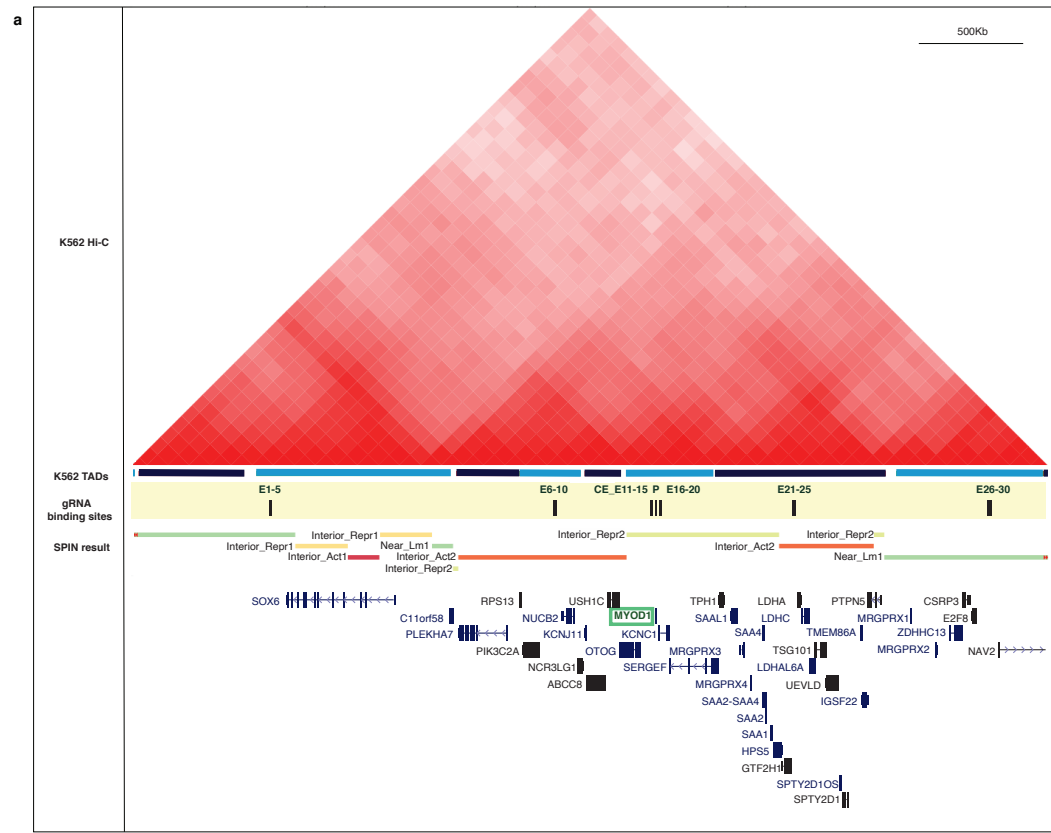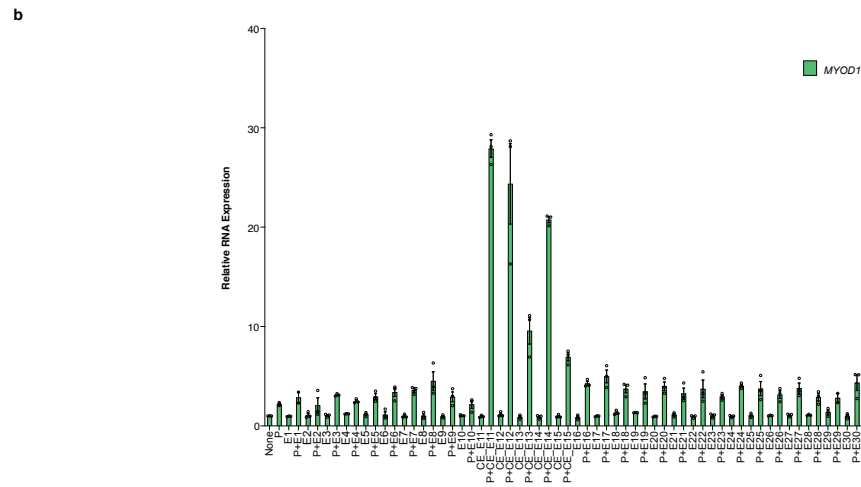

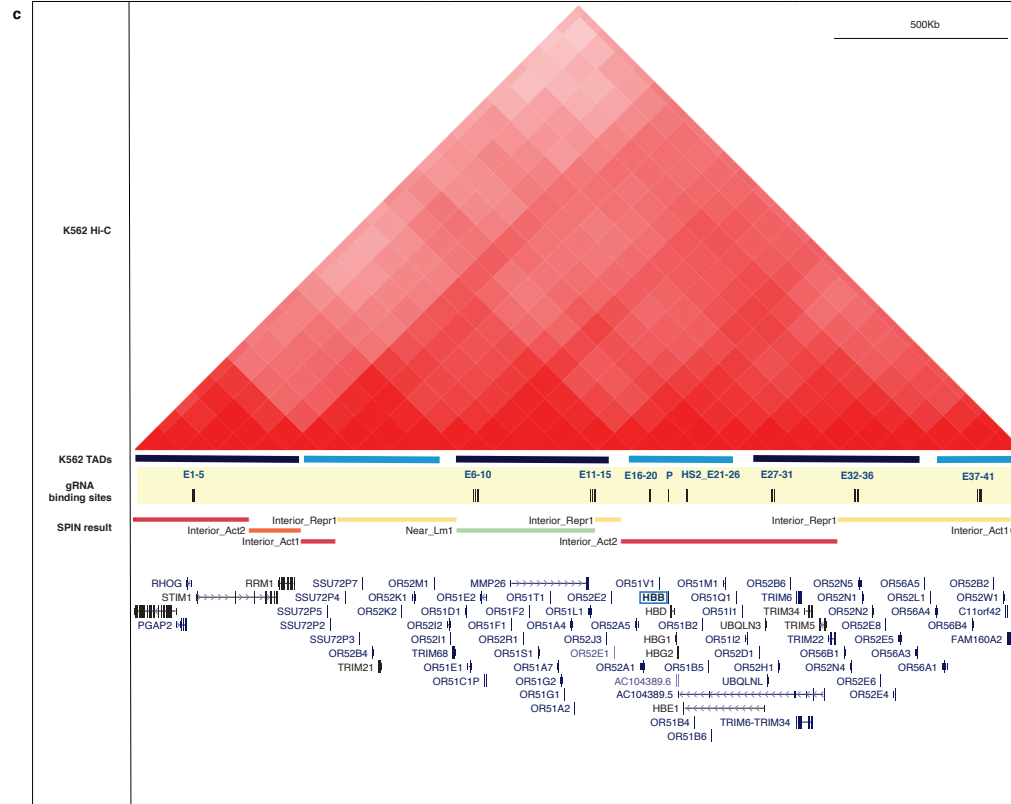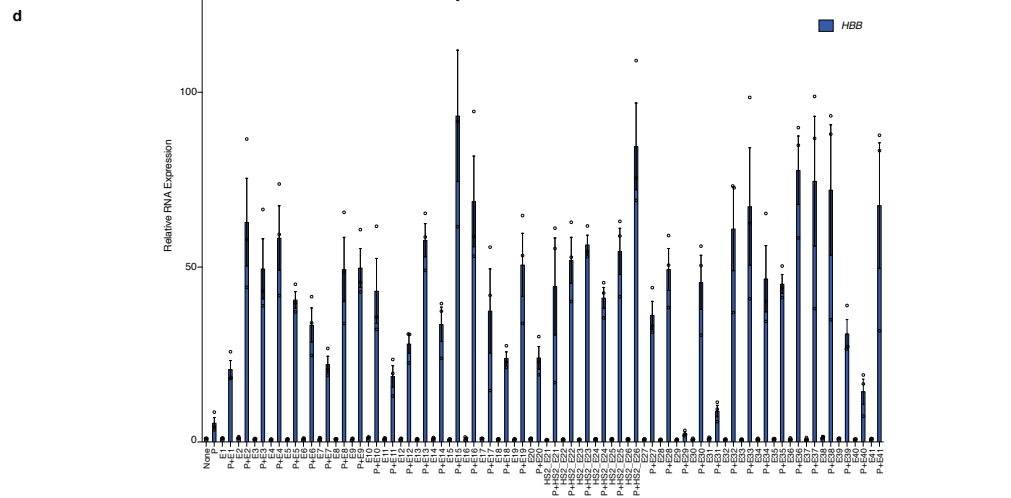

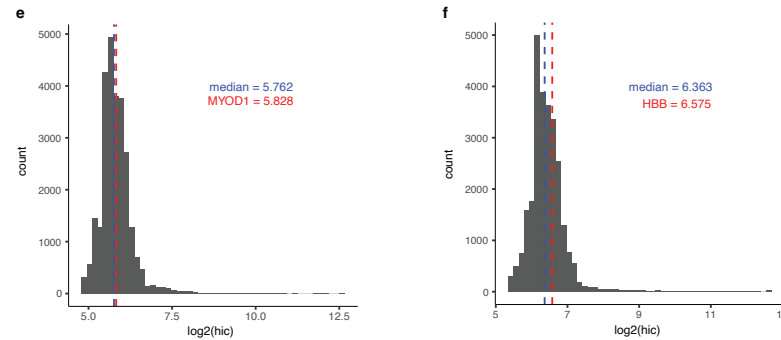

**Supplementary Figure 6. Comparison of heterotopic gene activation when targeting aTFs to known enhancers or other regions inside and outside of the TAD of the target gene.**

**a**, A Hi-C interaction map of chromosome 11 in K562 cells at 100 Kb resolution from Nucleome genome browser (<https://vis.nucleome.org/entry/>), shows the TAD containing *MYOD1* locus (*MYOD1* TAD) and adjacent TADs along a ~3.7 Mb region. P (**bold**) indicates the gRNA designed to target the *MYOD1* promoter, E1-E10 and E21-E30 indicate gRNAs targeting regions outside the *MYOD1* TAD, CE\_E11 -E15 indicates gRNAs targeting known *MYOD1* CE enhancer region, and E16-E20 indicates gRNAs targeting an unknown region equidistant from the TSS as the known enhancer within the *MYOD1* TAD. All gRNAs are targeted to non-coding regions with inactive chromatin state in K562.

**b**, *MYOD1* expression in K562 cells resulting from the bi-partite p65 aTF targeting the promoter (P), outside the *MYOD1* TAD region (E1-E10, E21-E30) and within the *MYOD1* TAD region harboring the known enhancer (CE\_E11 -E15) and the equidistant region as the known enhancer from *MYOD1* TSS (E16-E20). Open circles indicate biological replicates (n=3), bars the mean of replicates and error bars the s.e.m.

**c**, A Hi-C interaction map of chromosome 11 in K562 cells at 100 Kb resolution from Nucleome genome browser (<https://vis.nucleome.org/entry/>), shows the TAD containing *HBB* locus (*HBB* TAD) and adjacent TADs along a ~2.6 Mb region. P (bold) indicates the gRNA designed to target the *HBB* promoter, E1-E15 and E27-E41 indicate gRNAs targeting regions outside the *HBB* TAD, HS2\_E21 –E26 indicates gRNAs targeting the known *HBB* LCR HS2 enhancer region, and E16-E20 indicates gRNAs targeting an unknown region equidistant from the TSS as the known enhancer within the *HBB* TAD. All gRNAs are targeted to non-coding regions with inactive chromatin state in K562.

**d**, *HBB* expression in K562 cells resulting from the bi-partite p65 aTF targeting the promoter (P), outside the *HBB* TAD region (E1-E15, E27-E41) and within the *HBB* TAD region harboring the known enhancer (HS2\_E21 –E26) and the equidistant region as the known enhancer from *HBB* TSS (E16-E20). Open circles indicate biological replicates (n=3), bars the mean of replicates and error bars the s.e.m.

**e-f**, Histograms of average  $\log_2$ (Hi-C) contacts within genome-wide sliding windows of size 4.35 Mb and 2.575 Mb, chosen to match the sizes of the *MYOD1* and *HBB* loci, respectively. Dashed blue line corresponds to the median value for that distribution, and dashed red line corresponds to the values for *MYOD1* and *HBB*.

### Information about plasmids used in this study

|    | Name    | Addgene # | Description                                                 |
|----|---------|-----------|-------------------------------------------------------------|
| 1  | BPK1179 | TBD       | pCAG-NLS-dSpCas9(D10A,H840A)-NLS-3xFLAG-DmrA-DmrA-DmrA-DmrA |
| 2  | BPK617  | TBD       | pCAG-NLS-dSpCas9(D10A,H840A)-NLS-3xFLAG-VP64                |
| 3  | BPK1160 | TBD       | pCAG-NLS-dSpCas9(D10A,H840A)-NLS-3xFLAG-p65                 |
| 4  | JEH127  | TBD       | pCAG-NLS-dSpCas9(D10A,H840A)-NLS-3xHA-VPR(VP64-p65-RTA)     |
| 5  | BPK880  | TBD       | BPK880: pCAG-DmrC-NLS-3xFLAG-VP64                           |
| 6  | BPK1169 | 104564    | BPK1169: pCAG-DmrC-NLS-3xFLAG-p65                           |
| 7  | MMW948  | 104565    | MMW948: pCAG-DmrC-NLS-3xFLAG-VPR(VP64-p65-RTA)              |
| 8  | BPK1520 | 65777     | BPK1520 (pU6-BsmBICassette-S.pyogenes.sgRNA)                |
| 9  | JG1211  | 104567    | pCAG-human dLbCpf1(D832A)-NLS-3xHA-VPR                      |
| 10 | YET1000 | 104571    | pCAG-human dLbCpf1(D832A)-NLS-3xHA-DmrA(X4)                 |
| 11 | BPK3082 | 78742     | pU6-LbCpf1-crRNA-BsmBI cassette                             |

**BPK1179: pCAG-NLS-dSpCas9(D10A,H840A)-NLS-3xFLAG-DmrA-DmrA-DmrA-DmrA**

NNNN NLS

NNNN dSpCas9(D10A, H840A)

NNNN 3x FLAG Tag

NNNN DmrA

ATGGCGCCGAAAAAAAACGCAAAGTGAACGGCGGAGGGTCCGGAGGAGGCGGTAGCGGAGGCGATAAAAAGTATTCTATTGGTTTAGCCATC  
GGCACTAATTCCGTTGGATGGGCTGTCATAACCGATGAATACAAAGTACCTTCAAAGAAATTTAAGGTGTTGGGGAACACAGACCGTCATTCTGA  
TTAAAAAGAATCTTATCGGTGCCCTCTATTCGATAGTGGCGAAACGGCAGAGGCGACTCGCCTGAAACGAACCGCTCGGAGAAGGTATACACG  
TCGCAAGAACCGAATATGTTACTTACAAGAAATTTTTAGCAATGAGATGGCCAAAGTTGACGATTCTTTCTTTCACCGTTTGGAAAGAGTCCTTCT  
TGTCGAAGAGGACAAGAAACATGAACGGCACCCCATCTTTGGAAACATAGTAGATGAGGTGGCATATCATGAAAAGTACCCAACGATTTATCA  
CCTCAGAAAAAAGCTAGTTGACTCAACTGATAAAGCGGACCTGAGGTTAATCTACTTGGCTCTTGCCATATGATAAAGTTCCGTGGGCACCTTC  
TCATTGAGGGTGTCTAAATCCGGACAACCTCGGATGTCGACAACTGTTCCATCCAGTTAGTACAAACCTATAATCAGTTGTTTGAAGAGAACCCT  
ATAAATGCAAGTGGCGTGGATGCGAAGGCTATTCTTAGCGCCCGCCTCTCTAAATCCCACGGCTAGAAAACCTGATCGCACAAATTACCCGGAG  
AGAAGAAAAATGGGTTGTTGCGTAACCTTATAGCGCTCTACTAGGCCTGACACCAAATTTTAAGTCGAACTTCGACTTAGCTGAAGATGCCAAA  
TTGCAGCTTAGTAAGGACACGTACGATGACGATCTCGACAATCTACTGGCACAAATTGGAGATCAGTATGCGGACTTATTTTTGGCTGCCAAAA  
ACCTTAGCGATGCAATCCTCCTATCTGACATACTGAGAGTTAATACTGAGATTACCAAGGCGCCGTTATCCGCTTCAATGATCAAAGGTACGAT  
GAACATACCAAGACTTGACACTTCTCAAGGCCCTAGTCCGTCAGCAACTGCCTGAGAAATATAAGGAAATATTCTTTGATCAGTCGAAAAACG  
GGTACGCAGGTTATATTGACGGCGGAGCGAGTCAAGAGGAATTCTACAAGTTTATCAAACCCATATTAGAGAAGATGGATGGGACGGAAGAG  
TTGCTTGTA AAACTCAATCGCGAAGATCTACTGCGAAAGCAGCGGACTTTGACAACGGTAGCATTCCACATCAAATCCACTTAGGCGAATTGCA  
TGCTATACTTAGAAGGCAGGAGGATTTTTATCCGTTCTCAAAGACAATCGTGAAAAGATTGAGAAAATCCTAACCTTTCGCATACCTTACTATG  
TGGGACCCCTGGCCCGAGGGAACCTCGGTTTCGCATGGATGACAAGAAAGTCCGAAGAAACGATTACTCCATGGAATTTTGAAGAAAGTTGTCG  
ATAAAGGTGCGTCAGCTCAATCGTTCATCGAGAGGATGACCAACTTTGACAAGAATTTACCGAACGAAAAAGTATTGCCTAAGCACAGTTTACT  
TTACGAGTATTTACAGTGTACAATGAACTCACGAAAGTTAAGTATGTCACTGAGGGCATGCGTAAACCCGCCTTTCTAAGCGGAGAACAGAAG  
AAAGCAATAGTAGATCTGTTATTCAAGACCAACCGCAAAGTGACAGTTAAGCAATTGAAAGAGGACTACTTTAAGAAAATTGAATGCTTCGATT  
CTGTGAGATCTCCGGGGTAGAAGATCGATTTAATGCGTCACTTGGTACGTATCATGACCTCCTAAAGATAATTAAGATAAGGACTTCTGGAT  
AACGAAGAGAATGAAGATATCTTAGAAGATATAGTGTGACTCTTACCCTCTTTGAAGATCGGGAAATGATTGAGGAAAGACTAAAAACATAC  
GCTCACCTGTTTCGACGATAAGGTTATGAAACAGTTAAAGAGGCGTCGCTATACGGGCTGGGGACGATTGTCGCGGAAACTTATCAACGGGATA  
AGAGACAAGCAAAGTGGTAAACTATTCTCGATTTTCTAAAGAGCGACGGCTTCGCCAATAGGAACTTTATGCAGCTGATCCATGATGACTCTTT  
AACCTTCAAAGAGGATATACAAAAGGCACAGGTTTCCGGACAAGGGGACTCATTGCACGAACATATTGCGAATCTTGCTGGTTTCGCCAGCCATC  
AAAAAGGGCATACTCCAGACAGTCAAAGTAGTGGATGAGCTAGTTAAGGTCATGGGACGTCAAAAACCGGAAAACATTGTAATCGAGATGGC  
ACGCGAAAATCAAACGACTCAGAAGGGGGCAAAAAACAGTCGAGAGCGGATGAAGAGAATAGAAGAGGGTATTAAGAAGTGGGACGCCAG

ATCTTAAAGGAGCATCCTGTGGAAAATACCCAATTGCAGAACGAGAACTTTACCTCTATTACCTACAAAATGGAAGGGACATGTATGTTGATC  
AGGAACTGGACATAAACCGTTTATCTGATTACGACGTCGATGCCATTGTACCCAATCCTTTTTGAAGGACGATTCAATCGACAATAAAGTGCTT  
ACACGCTCGGATAAGAACCGAGGGAAAAGTGACAATGTTCCAAGCGAGGAAGTCGTAAGAAAATGAAGAACTATTGGCGGCAGCTCCTAAA  
TGCGAAACTGATAACGCAAAGAAAGTTTCGATAACTTAACTAAAGCTGAGAGGGGTGGCTTGTCTGAACTTGACAAGGCCGGATTTATTAACG  
TCAGCTCGTGGAAACCCGCCAATCACAAAGCATGTTGCACAGATACTAGATTCCCGAATGAATACGAAATACGACGAGAACGATAAGCTGATT  
CGGGAAGTCAAAGTAATCACTTTAAAGTCAAATTGGTGTGCGACTTCAGAAAGGATTTTCAATTCTATAAAGTTAGGGAGATAAATAACTACC  
ACCATGCGCACGACGCTTATCTTAATGCCGTCGTAGGGACCGCACTCATTAAAGAAATACCCGAAGCTAGAAAGTGAGTTTGTGTATGGTGATTA  
CAAAGTTTATGACGTCCGTAAGATGATCGCGAAAAGCGAACAGGAGATAGGCAAGGCTACAGCCAAATACTTCTTTTATTCTAACATTATGAAT  
TTCTTTAAGACGGAAATCACTCTGGCAAACGGAGAGATACGCAAACGACCTTTAATTGAAACCAATGGGGAGACAGGTGAAATCGTATGGGAT  
AAGGGCCGGGACTTCGCGACGGTGAGAAAAGTTTTGTCCATGCCCAAGTCAACATAGTAAAGAAAAGTGAAGTGCAGACCGGAGGGTTTTCA  
AAGGAATCGATTCTTCAAAAAGGAATAGTGATAAGCTCATCGCTCGTAAAAAGGACTGGGACCCGAAAAAGTACGGTGGCTTCGATAGCCCT  
ACAGTTGCCTATTCTGTCTAGTAGTGCCAAAAGTTGAGAAGGGAAAATCCAAGAACTGAAGTCAGTCAAAGAATTATTGGGGATAACGATT  
ATGGAGCGCTCGTCTTTTGAAGAAGCCCATCGACTTCTTGAGGCGAAAGGTTACAAGGAAGTAAAAAGGATCTCATAATTAAGTACCAA  
AGTATAGTCTGTTTGAAGTAGAAAATGGCCGAAAACGGATGTTGGCTAGCGCCGGAGAGCTTCAAAGGGGAACGAACTCGCACTACCGTCTA  
AATACGTGAATTTCTGTATTTAGCGTCCATTACGAGAAGTTGAAAGGTTACCTGAAGATAACGAACAGAAGCAACTTTTTGTTGAGCAGCAC  
AAACATTATCTCGACGAAATCATAGAGCAAATTTCCGAATTCAGTAAGAGAGTCATCCTAGCTGATGCCAATCTGGACAAAGTATTAAGCGCAT  
ACAACAAGCACAGGGATAAACCCATACGTGAGCAGGCGGAAAATATTATCCATTTGTTTACTCTTACCAACCTCGGCGCTCCAGCCGCATTCAAG  
TATTTTGACACAACGATAGATCGCAAACGATACACTTCTACCAAGGAGGTGCTAGACGCGCACTGATTCACCAATCCATCACGGGATTATATGA  
AACTCGGATAGATTTGTCACAGCTTGGGGGTGACGGATCCCCAAGAAGAAGAGGAAAGTTCGAGCGACTACAAGACCATGACGGTGATTAT  
AAAGATCATGACATCGATTACAAGGATGACGATGACAAGGCTGCAGGAGGCGGTGGAAGCGGGGAAGGGGAGTGCAGGTGGAACCATCTCC  
CCAGGAGACGGGCGCACCTTCCCAAGCGCGGCCAGACCTGCGTGGTGCACTACACCGGGATGCTTGAAGATGGAAAGAAATTTGATTCTCCCG  
GGACAGAAACAAGCCCTTTAAGTTTATGCTAGGCAAGCAGGAGGTGATCCGAGGCTGGGAAGAAGGGGTTGCCAGATGAGTGTGGGTGAGAGA  
GCCAAACTGACTATATCTCCAGATTATGCCTATGGTGCCACTGGGCACCCAGGCATCATCCCACCACATGCCACTCTCGTCTTCGATGTGGAGCTTCT  
AAAAGTGGAAAGTTCTAGGGGAGTGCAGGTGGAACCATCTCCCAAGGAGACGGGCGCACCTTCCCAAGCGCGGCCAGACCTGCGTGGTGCAC  
TACACCGGGATGCTTGAAGATGGAAAGAAATTTGATTCTCCCGGGACAGAAACAAGCCCTTTAAGTTTATGCTAGGCAAGCAGGAGGTGATCCG  
AGGCTGGGAAGAAGGGGTTGCCAGATGAGTGTGGGTGAGAGGCCAAACTGACTATATCTCCAGATTATGCCTATGGTGCCACTGGGCACCCAG  
GCATCATCCCACCACATGCCACTCTCGTCTTCGATGTGGAGCTTCTAAAAGTGGAAAGGGGAAGCGGTGGAAGCGGGAGGGGAGTGCAGGTGGA  
AACCATCTCCCAAGGAGACGGGCGCACCTTCCCAAGCGCGGCCAGACCTGCGTGGTGCCTACACCGGGATGCTTGAAGATGGAAAGAAATTTG  
ATTCTCCCGGGACAGAAACAAGCCCTTTAAGTTTATGCTAGGCAAGCAGGAGGTGATCCGAGGCTGGGAAGAAGGGGTTGCCAGATGAGTGT  
GGGTGAGAGGCCAAACTGACTATATCTCCAGATTATGCCTATGGTGCCACTGGGCACCCAGGCATCATCCCACCACATGCCACTCTCGTCTTCGAT  
GTGGAGCTTCTAAAAGTGGAAAGTTCTAGGGGAGTGCAGGTGGAACCATCTCCCAAGGAGACGGGCGCACCTTCCCAAGCGCGGCCAGACCTG



CGTGGTGCACTACACCGGGATGCTTGAAGATGGAAAGAAATTTGATTCCTCCCGGGACAGAAACAAGCCCTTTAAGTTTATGCTAGGCAAGCAGG  
AGGTGATCCGAGGCTGGGAAGAAGGGGTTGCCAGATGAGTGTGGGTCAGAGAGCCAAACTGACTATATCTCCAGATTATGCCTATGGTGCCACT  
GGCACCCAGGCATCATCCCACCACATGCCACTCTCGTCTTCGATGTGGAGCTTCTAAACTGGAA**GGATAA**

**BPK617: pCAG-NLS-dSpCas9(D10A,H840A)-NLS-3xFLAG-VP64**

NNNN NLS

NNNN dSpCas9(D10A, H840A)

NNNN 3x FLAG Tag

NNNN VP64

ATGGCGCCGAAAAAAAACGCAAAGTGAACGGCGGAGGGTCCGGAGGAGGCGGTAGCGGAGGCGATAAAAAGTATTCTATTGGTTTAGCCATC  
GGCACTAATTCCGTTGGATGGGCTGTCATAACCGATGAATACAAAGTACCTTCAAAGAAATTTAAGGTGTTGGGGAACACAGACCGTCATTCTGA  
TTAAAAGAATCTTATCGGTGCCCTCTATTGATAGTGGCGAAACGGCAGAGGCGACTCGCCTGAAACGAACCGCTCGGAGAAGGTATACACG  
TCGCAAGAACCGAATATGTTACTTACAAGAAATTTTTAGCAATGAGATGGCCAAAGTTGACGATTCTTTCTTTACCCTTTGGAAGAGTCCTTCT  
TGTCGAAGAGGACAAGAAACATGAACGGCACCCCATCTTTGGAAACATAGTAGATGAGGTGGCATATCATGAAAAGTACCCAACGATTTATCA  
CCTCAGAAAAAAGCTAGTTGACTCAACTGATAAAGCGGACCTGAGGTTAATCTACTTGGCTCTTGCCATATGATAAAGTTCCGTGGGCACTTTC  
TCATTGAGGGTGTCTAAATCCGGACAACCTCGGATGTCGACAACTGTTTCATCCAGTTAGTACAAACCTATAATCAGTTGTTTGAAGAGAACCCT  
ATAAATGCAAGTGGCGTGGATGCGAAGGCTATTCTTAGCGCCCGCCTCTCTAAATCCCACGGCTAGAAAACCTGATCGCACAAATTACCCGGAG  
AGAAGAAAAATGGGTTGTTGCGTAACCTTATAGCGCTCTACTAGGCCTGACACCAAATTTTAAGTCGAACTTCGACTTAGCTGAAGATGCCAAA  
TTGCAGCTTAGTAAGGACACGTACGATGACGATCTCGACAATCTACTGGCACAAATTGGAGATCAGTATGCGGACTTATTTTTGGCTGCCAAAA  
ACCTTAGCGATGCAATCCTCCTATCTGACATACTGAGAGTTAATACTGAGATTACCAAGGCGCCGTTATCCGCTTCAATGATCAAAGGTACGAT  
GAACATACCAAGACTTGACACTTCTCAAGGCCCTAGTCCGTCAGCAACTGCCTGAGAAATATAAGGAAATATTCTTTGATCAGTCGAAAAACG  
GGTACGCAGGTTATATTGACGGCGGAGCGAGTCAAGAGGAATTCTACAAGTTTATCAAACCCATATTAGAGAAGATGGATGGGACGGAAGAG  
TTGCTTGTA AAACTCAATCGCGAAGATCTACTGCGAAAGCAGCGGACTTTGACAACGGTAGCATTCCACATCAAATCCACTTAGGCGAATTGCA  
TGCTATACTTAGAAGGCAGGAGGATTTTTATCCGTTCTCAAAGACAATCGTGAAAAGATTGAGAAAATCCTAACCTTTCGCATACCTTACTATG  
TGGGACCCCTGGCCCGAGGGAACCTCGGTTTCGCATGGATGACAAGAAAGTCCGAAGAAACGATTACTCCATGGAATTTTGAAGAAAGTTGTCG  
ATAAAGGTGCGTCAGCTCAATCGTTCATCGAGAGGATGACCAACTTTGACAAGAATTTACCGAACGAAAAAGTATTGCCTAAGCACAGTTTACT  
TTACGAGTATTTACAGTGTACAATGAACTCACGAAAGTTAAGTATGTCACTGAGGGCATGCGTAAACCCGCCTTTCTAAGCGGAGAACAGAAG  
AAAGCAATAGTAGATCTGTTATTCAAGACCAACCGCAAAGTGACAGTTAAGCAATTGAAAGAGGACTACTTTAAGAAAATTGAATGCTTCGATT  
CTGTGAGATCTCCGGGGTAGAAGATCGATTTAATGCGTCACTTGGTACGTATCATGACCTCCTAAAGATAATTAAGATAAGGACTTCTGGAT  
AACGAAGAGAATGAAGATATCTTAGAAGATATAGTGTGACTCTTACCCTCTTTGAAGATCGGGAAATGATTGAGGAAAGACTAAAAACATAC  
GCTCACCTGTTTCGACGATAAGGTTATGAAACAGTTAAAGAGGCGTCGCTATACGGGCTGGGGACGATTGTCGCGGAAACTTATCAACGGGATA  
AGAGACAAGCAAAGTGGTAAACTATTCTCGATTTTCTAAAGAGCGACGGCTTCGCCAATAGGAACTTTATGCAGCTGATCCATGATGACTCTTT  
AACCTTCAAAGAGGATATACAAAAGGCACAGGTTTCCGGACAAGGGGACTCATTGCACGAACATATTGCGAATCTTGCTGGTTTCGCCAGCCATC  
AAAAAGGGCATACTCCAGACAGTCAAAGTAGTGGATGAGCTAGTTAAGGTCATGGGACGTCAAAAACCGGAAAACATTGTAATCGAGATGGC  
ACGCGAAAATCAAACGACTCAGAAGGGGGCAAAAAACAGTCGAGAGCGGATGAAGAGAATAGAAGAGGGTATTAAGAAGTGGGACGCCAG

ATCTTAAAGGAGCATCCTGTGGAAAATACCCAATTGCAGAACGAGAACTTTACCTCTATTACCTACAAAATGGAAGGGACATGTATGTTGATC  
AGGAACTGGACATAAACCGTTTTATCTGATTACGACGTCGATGCCATTGTACCCCAATCCTTTTTGAAGGACGATTCAATCGACAATAAAGTGCTT  
ACACGCTCGGATAAGAACCGAGGGGAAAAGTGACAATGTTCCAAGCGAGGAAGTCGTAAGAAAATGAAGAACTATTGGCGGCAGCTCCTAAA  
TGCGAAACTGATAACGCAAAGAAAGTTTCGATAACTTAACTAAAGCTGAGAGGGGTGGCTTGTCTGAACTTGACAAGGCCGGATTTATTAACG  
TCAGCTCGTGGAAACCCGCCAATCACAAAGCATGTTGCACAGATACTAGATTCCCGAATGAATACGAAATACGACGAGAACGATAAGCTGATT  
CGGGAAGTCAAAGTAATCACTTTAAAGTCAAATTGGTGTGCGACTTCAGAAAGGATTTTCAATTCTATAAAGTTAGGGAGATAAATAACTACC  
ACCATGCGCACGACGCTTATCTTAATGCCGTCGTAGGGACCGCACTCATTAAAGAAATACCCGAAGCTAGAAAGTGAGTTTGTGTATGGTGATTA  
CAAAGTTTATGACGTCCGTAAGATGATCGCGAAAAGCGAACAGGAGATAGGCAAGGCTACAGCCAAATACTTCTTTTATTCTAACATTATGAAT  
TTCTTTAAGACGGAAATCACTCTGGCAAACGGAGAGATACGCAAACGACCTTTAATTGAAACCAATGGGGAGACAGGTGAAATCGTATGGGAT  
AAGGGCCGGGACTTCGCGACGGTGAGAAAAGTTTTGTCCATGCCCAAGTCAACATAGTAAAGAAAAGTGAAGTGCAGACCGGAGGGTTTTCA  
AAGGAATCGATTCTTCAAAAAGGAATAGTGATAAGCTCATCGCTCGTAAAAAGGACTGGGACCCGAAAAAGTACGGTGGCTTCGATAGCCCT  
ACAGTTGCCTATTCTGTCCTAGTAGTGCCAAAAGTTGAGAAGGGAAAATCCAAGAACTGAAGTCAGTCAAAGAATTATTGGGGATAACGATT  
ATGGAGCGCTCGTCTTTTGAAGAAGCCCATCGACTTCCTTGAGGCGAAAGGTTACAAGGAAGTAAAAAGGATCTCATAATTAAGTACCAA  
AGTATAGTCTGTTTGAAGTTAGAAAATGGCCGAAAACGGATGTTGGCTAGCGCCGGAGAGCTTCAAAGGGGAACGAACTCGCACTACCGTCTA  
AATACGTGAATTTCTGTATTTAGCGTCCATTACGAGAAGTTGAAAGGTTACCTGAAGATAACGAACAGAAGCAACTTTTTGTTGAGCAGCAC  
AAACATTATCTCGACGAAATCATAGAGCAAATTTCCGAATTCAGTAAGAGAGTCATCCTAGCTGATGCCAATCTGGACAAAGTATTAAGCGCAT  
ACAACAAGCACAGGGATAAACCCATACGTGAGCAGGCGGAAAATATTATCCATTTGTTTACTCTTACCAACCTCGGCGCTCCAGCCGCATTCAAG  
TATTTTGACACAACGATAGATCGCAAACGATACACTTCTACCAAGGAGGTGCTAGACGCGCACTGATTCACCAATCCATCACGGGATTATATGA  
AACTCGGATAGATTTGTCACAGCTTGGGGGTGACGGATCCCCAAGAAGAAGAGGAAAGTTCGAGCGACTACAAGACCATGACGGTGATTAT  
AAAGATCATGACATCGATTACAAGGATGACGATGACAAGGCTGCAGGAGGCGGTGGAAGCGGGCGCGCCGACGCGCTGGACGATTTTCGATCTCG  
ACATGCTGGGTTCTGATGCCCTCGATGACTTTGACCTGGATATGTTGGGAAGCGACGCATTGGATGACTTTGATCTGGACATGCTCGGCTCCGATG  
CTCTGGACGATTTTCGATCTCGATATGTTA

**BPK1160: pCAG-NLS-dSpCas9(D10A,H840A)-NLS-3xFLAG-p65**

NNNN NLS

NNNN dSpCas9(D10A, H840A)

NNNN 3x FLAG Tag

NNNN p65

ATGGCGCCGAAAAAAAAACGCAAAGTGAACGGCGGAGGGTCCGGAGGAGGCGGTAGCGGAGGCGATAAAAAGTATTCTATTGGTTAGCCAT  
CGGCACTAATTCCGTTGGATGGGCTGTCATAACCGATGAATACAAAGTACCTTCAAAGAAATTTAAGGTGTTGGGGAACACAGACCGTCATTCCG  
ATTA AAAAGAATCTTATCGGTGCCCTCCTATTTCGATAGTGGCGAAACGGCAGAGGGCGACTCGCCTGAAACGAACCGCTCGGAGAAGGTATACAC  
GTCGCAAGAACCGAATATGTTACTTACAAGAAATTTTTAGCAATGAGATGGCCAAAGTTGACGATTCTTTCTTTCACCGTTTGAAGAGTCCTTCC  
TTGTGCAAGAGGACAAGAAACATGAACGGCACCCCATCTTTGGAAACATAGTAGATGAGGTGGCATATCATGAAAAGTACCCAACGATTTATC  
ACCTCAGAAAAAGCTAGTTGACTCAACTGATAAAGCGGACCTGAGGTTAATCTACTTGGCTCTTGCCCATATGATAAAGTTCCGTGGGCACTTT  
CTCATTGAGGGTGATCTAAATCCGGACAACCTCGGATGTGACAAACTGTTTCATCCAGTTAGTACAAACCTATAATCAGTTGTTTGAAGAGAACCC  
TATAAATGCAAGTGGCGTGGATGCGAAGGCTATTCTTAGCGCCCGCCTCTCTAAATCCCGACGGCTAGAAAACCTGATCGCACAAATTACCCGGA  
GAGAAGAAAAATGGGTTGTTGCGTAACCTTATAGCGCTCTCACTAGGCTGACACCAAATTTAAGTCGAACTTCGACTTAGCTGAAGATGCCA  
AATTGCAGCTTAGTAAGGACACGTACGATGACGATCTCGACAATCTACTGGCACAAATTGGAGATCAGTATGCGGACTTATTTTTGGCTGCCAA  
AAACCTTAGCGATGCAATCCTCCTATCTGACATACTGAGAGTTAATACTGAGATTACCAAGGCGCCGTTATCCGCTTCAATGATCAAAGGTACG  
ATGAACATACCAAGACTTGACACTTCTCAAGGCCCTAGTCCGTCAGCAACTGCCTGAGAAATATAAGGAAATATTCTTTGATCAGTCGAAAAAC  
GGGTACGCAGGTTATATTGACGGCGGAGCGAGTCAAGAGGAATTCTACAAGTTTATCAAACCCATATTAGAGAAGATGGATGGGACGGAAGA  
GTTGCTTGTA AAACTCAATCGCGAAGATCTACTGCGAAAGCAGCGGACTTTGACAACGGTAGCATTCCACATCAAATCCACTTAGGCGAATTGC  
ATGCTATACTTAGAAGGCAGGAGGATTTTTATCCGTTCTCAAAGACAATCGTGAAAAGATTGAGAAAATCCTAACCTTTCGCATACCTTACTAT  
GTGGGACCCCTGGCCCGAGGAACTCTCGGTTGCGATGGATGACAAGAAAGTCCGAAGAAACGATTACTCCATGGAATTTTGAAGGAAGTTGTC  
GATAAAGGTGCGTCAGCTCAATCGTTCATCGAGAGGATGACCAACTTTGACAAGAATTTACCGAACGAAAAAGTATTGCCTAAGCACAGTTTAC  
TTTACGAGTATTTACAGTGTACAATGAACTCACGAAAGTTAAGTATGTCACTGAGGGCATGCGTAAACCCGCCTTTCTAAGCGGAGAACAGAA  
GAAAGCAATAGTAGATCTGTTATTCAAGACCAACCGCAAAGTGACAGTTAAGCAATTGAAAGAGGACTACTTTAAGAAAATTGAATGCTTCGAT  
TCTGTCGAGATCTCCGGGGTAGAAGATCGATTTAATGCGTCACTTGGTACGTATCATGACCTCCTAAAGATAATTAAGATAAGGACTTCCTGGA  
TAACGAAGAGAATGAAGATATCTTAGAAGATATAGTGTGACTCTTACCCTCTTTGAAGATCGGGAAATGATTGAGGAAAGACTAAAAACATA  
CGCTCACCTGTTGACGATAAGGTTATGAAACAGTTAAAGAGGCGTGCCTATACGGGCTGGGGACGATTGTCGCGGAAACTTATCAACGGGAT  
AAGAGACAAGCAAAGTGGTAAAAC TATTCTCGATTTTCTAAAGAGCGACGGCTTCGCCAATAGGAACTTTATGCAGCTGATCCATGATGACTCTT  
TAACCTTCAAAGAGGATATACAAAAGGCACAGGTTTCCGGACAAGGGGACTCATTGCACGAACATATTGCGAATCTTGCTGGTTCCGCCAGCCAT  
CAAAAAGGGCATACTCCAGACAGTCAAAGTAGTGGATGAGCTAGTTAAGGTCATGGGACGTCACAAACCGGAAAAACATTGTAATCGAGATGGC  
ACGCGAAAATCAAACGACTCAGAAGGGGGCAAAAAACAGTCGAGAGCGGATGAAGAGAATAGAAGAGGGGTATTAAGAACTGGGCAGCCAG

ATCTTAAAGGAGCATCCTGTGGAAAATACCCAATTGCAGAACGAGAACTTTACCTCTATTACCTACAAAATGGAAGGGACATGTATGTTGATC  
AGGAACTGGACATAAACCGTTTATCTGATTACGACGTCGATGCCATTGTACCCCAATCCTTTTTGAAGGACGATTCAATCGACAATAAAGTGCTT  
ACACGCTCGGATAAGAACCGAGGGGAAAAGTGACAATGTTCCAAGCGAGGAAGTCGTAAGAAAATGAAGAACTATTGGCGGCAGCTCCTAAA  
TGCGAAACTGATAACGCAAAGAAAGTTTCGATAACTTAACTAAAGCTGAGAGGGGTGGCTTGTCTGAACTTGACAAGGCCGGATTTATTAACG  
TCAGCTCGTGAAACCCGCCAATCACAAAGCATGTTGCACAGATACTAGATTCCCGAATGAATACGAAATACGACGAGAACGATAAGCTGATT  
CGGGAAGTCAAAGTAATCACTTTAAAGTCAAATTGGTGTGCGACTTCAGAAAGGATTTTCAATTCTATAAAGTTAGGGAGATAAATAACTACC  
ACCATGCGCACGACGCTTATCTTAATGCCGTCGTAGGGACCGCACTCATTAAAGAAATACCCGAAGCTAGAAAGTGAGTTTGTGTATGGTGATTA  
CAAAGTTTATGACGTCCGTAAGATGATCGCGAAAAGCGAACAGGAGATAGGCAAGGCTACAGCCAAATACTTCTTTTATTCTAACATTATGAAT  
TTCTTTAAGACGGAAATCACTCTGGCAAACGGAGAGATACGCAAACGACCTTTAATTGAAACCAATGGGGAGACAGGTGAAATCGTATGGGAT  
AAGGGCCGGGACTTCGCGACGGTGAGAAAAGTTTTGTCCATGCCCAAGTCAACATAGTAAAGAAAAGTGAAGTGCAGACCGGAGGGTTTTCA  
AAGGAATCGATTCTTCAAAAAGGAATAGTGATAAGCTCATCGCTCGTAAAAAGGACTGGGACCCGAAAAAGTACGGTGGCTTCGATAGCCCT  
ACAGTTGCCTATTCTGTCTAGTAGTGCCAAAAGTTGAGAAGGGAAAATCCAAGAACTGAAGTCAGTCAAAGAATTATTGGGGATAACGATT  
ATGGAGCGCTCGTCTTTTGAAGAAGCCCATCGACTTCCTTGAGGCGAAAGGTTACAAGGAAGTAAAAAGGATCTCATAATTAAGTACCAA  
AGTATAGTCTGTTTGAAGTAGAAAATGGCCGAAAACGGATGTTGGCTAGCGCCGGAGAGCTTCAAAGGGGAACGAACTCGCACTACCGTCTA  
AATACGTGAATTTCTGTATTTAGCGTCCATTACGAGAAGTTGAAAGGTTACCTGAAGATAACGAACAGAAGCAACTTTTTGTTGAGCAGCAC  
AAACATTATCTCGACGAAATCATAGAGCAAATTTCCGAATTCAGTAAGAGAGTCATCCTAGCTGATGCCAATCTGGACAAAGTATTAAGCGCAT  
ACAACAAGCACAGGGATAAACCCATACGTGAGCAGGCGGAAAATATTATCCATTTGTTTACTCTTACCAACCTCGGCGCTCCAGCCGCATTCAAG  
TATTTTGACACAACGATAGATCGCAAACGATACACTTCTACCAAGGAGGTGCTAGACGCGCACTGATTCACCAATCCATCACGGGATTATATGA  
AACTCGGATAGATTTGTCACAGCTTGGGGGTGACGGATCCCCAAGAAGAAGAGGAAAGTTCGAGCGACTACAAGACCATGACGGTGATTAT  
AAAGATCATGACATCGATTACAAGGATGACGATGACAAGGCTGCAGGAGGCGGTGGAAGCGGGATGGAGTTCCAGTACCTGCCAGATACAGACG  
ATCGTCACCGGATTGAGGAGAAAACGTAAGAGGACATATGAGACCTTCAAGAGCATCATGAAGAAGAGTCCTTTCAGCGGACCCACCGACCCCGG  
CCTCCACCTCGACGCATTGCTGTGCCCTTCCCGCAGCTCAGCTTCTGTCCCAAGCCAGCACCCAGCCCTATCCCTTTACGTCATCCCTGAGCACCATC  
AACTATGATGAGTTTCCACCATGGTGTTCCTTCTGGGCAGATCAGCCAGGCCTCGGCCTTGGCCCCGGCCCTCCCAAGTCTGCCCCAGGCTC  
CAGCCCCTGCCCTGCTCCAGCCATGGTATCAGCTCTGGCCCAGGCCCCAGCCCCTGTCCAGTCTAGCCCCAGGCCCTCCTCAGGCTGTGGCCCC  
ACCTGCCCCAAGCCCACCCAGGCTGGGGAAGGAACGCTGTCAGAGGCCCTGCTGCAGCTGCAGTTTGTATGATGAAGACCTGGGGGCCTTGCTTG  
GCAACAGCACAGACCCAGCTGTGTTACAGACCTGGCATCCGTCGATAACTCCGAGTTTTCAGCAGCTGCTGAACCAGGGCATACTGTGGCCCCC  
ACACAAGTGAAGCCATGCTGATGGAGTACCCTGAGGCTATAACTCGCCTAGTGACAGGGGCCAGAGGCCCCCGACCCAGCTCCTGCTCCACTGG  
GGGCCCGGGGCTCCCAATGGCCTCCTTTCAGGAGATGAAGACTTCTCCTCCATTGCGGACATGGACTTCTCAGCCCTGCTGAGTCAGATCAGCTC  
TTAA

**JEH127: pCAG-NLS-dSpCas9(D10A,H840A)-NLS-3xHA-VPR(VP64-p65-RTA)**

NNNN NLS

NNNN dSpCas9(D10A, H840A)

NNNN 3x HA Tag

NNNN VPR

ATGGCGCCGAAAAAAAACGCAAAGTGAACGGCGGAGGGTCCGGAGGAGGCGGTAGCGGAGGCGATAAAAAGTATTCTATTGGTTTAGCCATC  
GGCACTAATTCCGTTGGATGGGCTGTCATAACCGATGAATACAAAGTACCTTCAAAGAAATTTAAGGTGTTGGGGAACACAGACCGTCATTCTGA  
TTAAAAAGAATCTTATCGGTGCCCTCTATTGATAGTGGCGAAACGGCAGAGGCGACTCGCCTGAAACGAACCGCTCGGAGAAGGTATACACG  
TCGCAAGAACCGAATATGTTACTTACAAGAAATTTTTAGCAATGAGATGGCCAAAGTTGACGATTCTTTCTTCCACCGTTTGGAAAGAGTCCTTCT  
TGTCGAAGAGGACAAGAAACATGAACGGCACCCCATCTTTGGAAACATAGTAGATGAGGTGGCATATCATGAAAAGTACCCAACGATTTATCA  
CCTCAGAAAAAAGCTAGTTGACTCAACTGATAAAGCGGACCTGAGGTTAATCTACTTGGCTCTTGCCATATGATAAAGTTCCGTGGGCACCTTC  
TCATTGAGGGTGTCTAAATCCGGACAACCTCGGATGTCGACAACTGTTTCATCCAGTTAGTACAAACCTATAATCAGTTGTTTGAAGAGAACCCT  
ATAAATGCAAGTGGCGTGGATGCGAAGGCTATTCTTAGCGCCCGCCTCTCTAAATCCCACGGCTAGAAAACCTGATCGCACAAATTACCCGGAG  
AGAAGAAAAATGGGTTGTTGCGTAACCTTATAGCGCTCTACTAGGCCTGACACCAAATTTAAGTCGAACTTCGACTTAGCTGAAGATGCCAAA  
TTGCAGCTTAGTAAGGACACGTACGATGACGATCTCGACAATCTACTGGCACAAATTGGAGATCAGTATGCGGACTTATTTTTGGCTGCCAAAA  
ACCTTAGCGATGCAATCCTCCTATCTGACATACTGAGAGTTAATACTGAGATTACCAAGGCGCCGTTATCCGCTTCAATGATCAAAGGTACGAT  
GAACATACCAAGACTTGACACTTCTCAAGGCCCTAGTCCGTCAGCAACTGCCTGAGAAATATAAGGAAATATTCTTTGATCAGTCGAAAAACG  
GGTACGCAGGTTATATTGACGGCGGAGCGAGTCAAGAGGAATTCTACAAGTTTATCAAACCCATATTAGAGAAGATGGATGGGACGGAAGAG  
TTGCTTGTA AAACTCAATCGCGAAGATCTACTGCGAAAGCAGCGGACTTTGACAACGGTAGCATTCCACATCAAATCCACTTAGGCGAATTGCA  
TGCTATACTTAGAAGGCAGGAGGATTTTTATCCGTTCTCAAAGACAATCGTGAAAAGATTGAGAAAATCCTAACCTTTCGCATACCTTACTATG  
TGGGACCCCTGGCCCGAGGGAACCTCTCGGTTGCGATGGATGACAAGAAAGTCCGAAGAAACGATTACTCCATGGAATTTTGAAGAAAGTTGTCG  
ATAAAGGTGCGTCAGCTCAATCGTTCATCGAGAGGATGACCAACTTTGACAAGAATTTACCGAACGAAAAAGTATTGCCTAAGCACAGTTTACT  
TTACGAGTATTTACAGTGTACAATGAACTCACGAAAGTTAAGTATGTCACTGAGGGCATGCGTAAACCCGCCTTTCTAAGCGGAGAACAGAAG  
AAAGCAATAGTAGATCTGTTATTCAAGACCAACCGCAAAGTGACAGTTAAGCAATTGAAAGAGGACTACTTTAAGAAAATTGAATGCTTCGATT  
CTGTGAGATCTCCGGGGTAGAAGATCGATTTAATGCGTCACTTGGTACGTATCATGACCTCCTAAAGATAATTAAGATAAGGACTTCTGGAT  
AACGAAGAGAATGAAGATATCTTAGAAGATATAGTGTGACTCTTACCCTCTTTGAAGATCGGGAAATGATTGAGGAAAGACTAAAAACATAC  
GCTCACCTGTTGACGATAAGGTTATGAAACAGTTAAAGAGGCGTCGCTATACGGGCTGGGGACGATTGTCGCGGAAACTTATCAACGGGATA  
AGAGACAAGCAAAGTGGTAAACTATTCTCGATTTTCTAAAGAGCGACGGCTTCGCCAATAGGAACTTTATGCAGCTGATCCATGATGACTCTTT  
AACCTTCAAAGAGGATATACAAAAGGCACAGGTTTCCGGACAAGGGGACTCATTGCACGAACATATTGCGAATCTTGCTGGTTGCGCCAGCCATC  
AAAAAGGGCATACTCCAGACAGTCAAAGTAGTGGATGAGCTAGTTAAGGTCATGGGACGTCAAAAACCGGAAAACATTGTAATCGAGATGGC  
ACGCGAAAATCAAACGACTCAGAAGGGGGCAAAAAACAGTCGAGAGCGGATGAAGAGAATAGAAGAGGGTATTAAGAAGTGGGACGCCAG

ATCTTAAAGGAGCATCCTGTGGAAAATACCCAATTGCAGAACGAGAACTTTACCTCTATTACCTACAAAATGGAAGGGACATGTATGTTGATC  
AGGAACTGGACATAAACCGTTTATCTGATTACGACGTCGATGCCATTGTACCCCAATCCTTTTTGAAGGACGATTCAATCGACAATAAAGTGCTT  
ACACGCTCGGATAAGAACCGAGGGGAAAAGTGACAATGTTCCAAGCGAGGAAGTCGTAAGAAAATGAAGAACTATTGGCGGCAGCTCCTAAA  
TGCGAAACTGATAACGCAAAGAAAGTTTCGATAACTTAACTAAAGCTGAGAGGGGTGGCTTGTCTGAACTTGACAAGGCCGGATTTATTAACG  
TCAGCTCGTGGAAACCCGCCAATCACAAAGCATGTTGCACAGATACTAGATTCCCGAATGAATACGAAATACGACGAGAACGATAAGCTGATT  
CGGGAAGTCAAAGTAATCACTTTAAAGTCAAATTGGTGTGCGACTTCAGAAAGGATTTTCAATTCTATAAAGTTAGGGAGATAAATAACTACC  
ACCATGCGCACGACGCTTATCTTAATGCCGTCGTAGGGACCGCACTCATTAAAGAAATACCCGAAGCTAGAAAGTGAGTTTGTGTATGGTGATTA  
CAAAGTTTATGACGTCCGTAAGATGATCGCGAAAAGCGAACAGGAGATAGGCAAGGCTACAGCCAAATACTTCTTTTATTCTAACATTATGAAT  
TTCTTTAAGACGGAAATCACTCTGGCAAACGGAGAGATACGCAAACGACCTTTAATTGAAACCAATGGGGAGACAGGTGAAATCGTATGGGAT  
AAGGGCCGGGACTTCGCGACGGTGAGAAAAGTTTTGTCCATGCCCAAGTCAACATAGTAAAGAAAAGTGAAGTGCAGACCGGAGGGTTTTCA  
AAGGAATCGATTCTTCAAAAAGGAATAGTGATAAGCTCATCGCTCGTAAAAAGGACTGGGACCCGAAAAAGTACGGTGGCTTCGATAGCCCT  
ACAGTTGCCTATTCTGTCCTAGTAGTGCCAAAAGTTGAGAAGGGAAAATCCAAGAACTGAAGTCAGTCAAAGAATTATTGGGGATAACGATT  
ATGGAGCGCTCGTCTTTTGAAGAAGCCCATCGACTTCTTGAGGCGAAAGGTTACAAGGAAGTAAAAAGGATCTCATAATTAAGTACCAA  
AGTATAGTCTGTTTGAAGTAGAAAATGGCCGAAAACGGATGTTGGCTAGCGCCGGAGAGCTTCAAAGGGGAACGAACTCGCACTACCGTCTA  
AATACGTGAATTTCTGTATTTAGCGTCCATTACGAGAAGTTGAAAGGTTACCTGAAGATAACGAACAGAAGCAACTTTTTGTTGAGCAGCAC  
AAACATTATCTCGACGAAATCATAGAGCAAATTTCCGAATTCAGTAAGAGAGTCATCCTAGCTGATGCCAATCTGGACAAAGTATTAAGCGCAT  
ACAACAAGCACAGGGATAAACCCATACGTGAGCAGGCGGAAAATATTATCCATTTGTTTACTCTTACCAACCTCGGCGCTCCAGCCGCATTCAAG  
TATTTTGACACAACGATAGATCGCAAACGATACACTTCTACCAAGGAGGTGCTAGACGCGCACTGATTCACCAATCCATCACGGGATTATATGA  
AACTCGGATAGATTTGTCACAGCTTGGGGGTGACGGATCCCCAAGAAGAAGAGGAAAAGTCAAAGGCCGGCGCCACGAAAAAGGCCGGCCA  
GGCAAAAAGAAAAGGGATCTACCCATACGATGTTCCAGATTACGCTTATCCCTACGACGTGCCTGATTATGCATACCCATATGATGTCCCGAC  
TATGCCGGAAGCGAGGCCAGCGGTTCCGGACGGGCTGACGCATTGGACGATTTTGATCTGGATATGCTGGGAAGTGACGCCCTCGATGATTTTGA  
CCTTGACATGCTTGGTTCGGATGCCCTTGATGACTTTGACCTCGACATGCTCGGCAGTGACGCCCTTGATGATTTGACCTGGACATGCTGATTAAC  
TCTAGAAGTTCCGGATCTCCGAAAAAGAAACGCAAAGTTGGTAGCCAGTACCTGCCCGACACCGACCGGCACCGGATCGAGGAAAAGCGGA  
AGCGGACCTACGAGACATTCAAGAGCATCATGAAGAAGTCCCCCTTCAGCGGCCCCACCGACCCTAGACCTCCACCTAGAAGAATCGCCGTGCCCA  
GCAGATCCAGCGCCAGCGTGCCAAAACCTGCCCCCAGCCTTACCCCTTACCAGCAGCCTGAGCACCATCAACTACGACGAGTTCCCTACCATGGT  
GTTCCCGAGCGGCCAGATCTCTCAGGCCTCTGCTCTGGCTCCAGCCCCTCTCAGGTGCTGCCTCAGGCTCCTGCTCCTGCACCAGCTCCAGCCATG  
GTGTCTGCACTGGCTCAGGCACCAGCACCCGTGCCTGTGCTGGCTCCTGGACCTCCACAGGCTGTGGCTCCACCAGCCCCTAAACCTACACAGGCC  
GGCGAGGGCACACTGTCTGAAGCTCTGCTGCAGCTGCAGTTCGACGACGAGGATCTGGGAGCCCTGCTGGGAAACAGCACCGATCCTGCCGTGT  
CACCGACCTGGCCAGCGTGGAACAACAGCGAGTTCAGCAGCTGCTGAACCAGGGCATCCCTGTGGCCCCTCACACCACCGAGCCCATGCTGATGG  
AATACCCCGAGGCCATCACCCGGCTCGTGACAGGCGCTCAGAGGCCTCCTGATCCAGCTCCTGCCCTCTGGGAGCACCGGCCTGCCTAATGGAC  
TGCTGTCTGGCGACGAGGACTTCAGCTCTATCGCCGATATGGATTTCTCAGCCTTGCTGGGCTCTGGCAGCGGCAGCCGGGATTCCAGGGAAGGG

ATGTTTTTGCCGAAGCCTGAGGCCGGCTCCGCTATTAGTGACGTGTTTGAGGGCCGCGAGGTGTGCCAGCCAAAACGAATCCGGCCATTTATCCT  
CCAGGAAGTCCATGGGCCAACC GCCACTCCCCGCCAGCCTCGCACCAACACCAACCGGTCCAGTACATGAGCCAGTCGGGTCACTGACCCCGGCA  
CCAGTCCCTCAGCCACTGGATCCAGCGCCCGCAGTGACTCCCGAGGCCAGTCACCTGTTGGAGGATCCCGATGAAGAGACGAGCCAGGCTGTCAA  
AGCCCTTCGGGAGATGGCCGATACTGTGATTCCCCAGAAGGAAGAGGCTGCAATCTGTGGCCAAATGGACCTTTCCCATCCGCCCCCAAGGGGCC  
ATCTGGATGAGCTGACAACCACACTTGAGTCCATGACCGAGGATCTGAACCTGGACTCACCCCTGACCCCGGAATTGAACGAGATTCTGGATACCT  
TCCTGAACGACGAGTGCCTCTTGCATGCCATGCATATCAGCACAGGACTGTCCATCTTCGACACATCTCTGTTTTAA



**BPK880: pCAG-DmrC-NLS-3xFLAG-VP64**

NNNN NLS

NNNN DmrC

NNNN 3x FLAG Tag

NNNN VP64

ATGGGATCCAGAATCCTCTGGCATGAGATGTGGCATGAAGGCCTGGAAGAGGCATCTCGTTTGTACTTTGGGGAAAGGAACGTGAAAGGCATG  
TTTGAGGTGCTGGAGCCCTTGCATGCTATGATGGAACGGGGACCCAGACTCTGAAGGAAACATCCTTTAATCAGGCCTATGGTCGAGATTTAA  
TGGAGGCCCAAGAGTGGTGCAGGAAGTACATGAAATCAGGGAATGTCAAGGACCTCCTCCAAGCCTGGGACCTCTATTATCATGTGTTCCGACG  
AATCTCAAAGGGCGGCGGATCCCCAAGAAGAAGAGGAAAAGTCTCGAGCGACTACAAAGACCATGACGGTGATTATAAAGATCATGACATCGAT  
TACAAGGATGACGATGACAAGGCTGCAGGAGGCGGTGGAAGCGGGCGCGCCGACGCGCTGGACGATTTTCGATCTCGACATGCTGGGTTCTGATG  
CCCTCGATGACTTTGACCTGGATATGTTGGGAAGCGACGCATTGGATGACTTTGATCTGGACATGCTCGGCTCCGATGCTCTGGACGATTTTCGATCT  
CGATATGTTATAA

**BPK1169: pCAG-DmrC-NLS-3xFLAG-p65**

NNNN NLS

NNNN DmrC

NNNN 3x FLAG Tag

NNNN p65

ATGGGATCCAGAATCCTCTGGCATGAGATGTGGCATGAAGGCCTGGAAGAGGCATCTCGTTTGTACTTTGGGGAAAGGAACGTGAAAGGCATG  
TTTGAGGTGCTGGAGCCCTTGCATGCTATGATGGAACGGGGACCCAGACTCTGAAGGAAACATCCTTTAATCAGGCCTATGGTCGAGATTTAA  
TGGAGGCCCAAGAGTGGTGCAGGAAGTACATGAAATCAGGGAATGTCAAGGACCTCCTCCAAGCCTGGGACCTCTATTATCATGTGTTCCGACG  
AATCTCAAAGGGCGGCGGATCCCCAAGAAGAAGAGGAAAAGTCTCGAGCGACTACAAAGACCATGACGGTGATTATAAAGATCATGACATCGAT  
TACAAGGATGACGATGACAAGGCTGCAGGAGGCGGTGGAAGCGGGATGGAGTTCAGTACCTGCCAGATACAGACGATCGTCACCGGATTGAGG  
AGAAACGTAAAAGGACATATGAGACCTTCAAGAGCATCATGAAGAAGAGTCCTTTACGCGGACCCACCGACCCCCGGCCTCCACCTCGACGCATTG  
CTGTGCCTTCCCGCAGCTCAGCTTCTGTCCCAAGCCAGCACCCAGCCCTATCCCTTACGTCATCCCTGAGCACCATCAACTATGATGAGTTTCCC  
ACCATGGTGTTCCTTCTGGGCAGATCAGCCAGGCCTCGGCCTTGGCCCCGGCCCCCTCCCAAGTCCTGCCCCAGGCTCCAGCCCCTGCCCCTGCTC  
CAGCCATGGTATCAGCTCTGGCCAGGCCCCAGCCCCTGTCCAGTCCTAGCCCCAGGCCCTCCTCAGGCTGTGGCCCCACCTGCCCCAAGCCCAC  
CCAGGCTGGGGAAGGAACGCTGTGAGAGGCCCTGCTGCAGCTGCAGTTTGTGATGATGAAGACCTGGGGGCCTTGCTTGGCAACAGCACAGACCCA  
GCTGTGTTACAGACCTGGCATCCGTCGATAACTCCGAGTTTCAGCAGCTGCTGAACCAGGGCATACTGTGGCCCCCACACAAGTGGAGCCCATG  
CTGATGGAGTACCCTGAGGCTATAACTCGCCTAGTGACAGGGGCCAGAGGCCCCCCGACCCAGCTCCTGCTCCACTGGGGGCCCGGGGCTCCC  
CAATGGCCTCCTTTCAGGAGATGAAGACTTCTCCTCCATTGCGGACATGGACTTCTCAGCCCTGCTGAGTCAGATCAGCTCTTAA

**MMW948: pCAG-DmrC-NLS-3xFLAG-VPR(VP64-p65-RTA)**

NNNN NLS

NNNN DmrC

NNNN 3x FLAG Tag

NNNN VPR

ATGGGATCCAGAATCCTCTGGCATGAGATGTGGCATGAAGGCCTGGAAGAGGCATCTCGTTTGTACTTTGGGGAAAGGAACGTGAAAGGCATG  
TTTGAGGTGCTGGAGCCCTTGCATGCTATGATGGAACGGGGACCCAGACTCTGAAGGAAACATCCTTTAATCAGGCCTATGGTCGAGATTTAA  
TGGAGGCCCAAGAGTGGTGCAGGAAGTACATGAAATCAGGGAATGTCAAGGACCTCCTCCAAGCCTGGGACCTCTATTATCATGTGTTCCGACG  
AATCTCAAAGGGCGGCGGATCCCCAAGAAGAAGAGGAAAGTCTCGAGCGACTACAAAGACCATGACGGTGATTATAAAGATCATGACATCGAT  
TACAAGGATGACGATGACAAGGCTGCAGGAGGCGGTGGAAGCGGGTCGGAGGCCAGCGGTTCCGGACGGGCTGACGCATTGGACGATTTTGGAT  
CTGGATATGCTGGGAAGTGACGCCCTCGATGATTTTACCTTGACATGCTTGGTTTCGGATGCCCTTGATGACTTTGACCTCGACATGCTCGGCAGTG  
ACGCCCTTGATGATTTGACCTGGACATGCTGATTAAGTCTAGAAGTTCCGGATCTCCGAAAAAGAAACGCAAAGTTGGTAGCCAGTACCTGCCCG  
ACACCGACGACCGGCACCGGATCGAGGAAAAGCGGAAGCGGACCTACGAGACATTCAAGAGCATCATGAAGAAGTCCCCCTCAGCGGCCCCACC  
GACCCTAGACCTCCACCTAGAAGAATCGCCGTGCCAGCAGATCCAGCGCCAGCGTGCCAAAACCTGCCCCCAGCCTTACCCCTTACCAGCAGCC  
TGAGCACCATCAACTACGACGAGTTCCTACCATGGTGTTCCTCCAGCGGCCAGATCTCTCAGGCCTCTGCTCTGGCTCCAGCCCCTCCTCAGGTGCT  
GCCTCAGGCTCCTGCTCCTGCACCAGCTCCAGCCATGGTGTCTGCACTGGCTCAGGCACCAGCACCCGTGCCTGTGCTGGCTCCTGGACCTCCACAG  
GCTGTGGCTCCACCAGCCCCTAAACCTACACAGGCCGCGGAGGGCACACTGTCTGAAGCTCTGCTGCAGCTGCAGTTCGACGACGAGGATCTGGG  
AGCCCTGCTGGGAAACAGCACCGATCCTGCCGTGTTACCGACCTGGCCAGCGTGGACAACAGCGAGTTCAGCAGCTGCTGAACCAGGGCATCC  
CTGTGGCCCCTCACACCACCGAGCCCATGCTGATGGAATACCCGAGGCCATCACCCGGCTCGTGACAGGCGCTCAGAGGCCTCCTGATCCAGCTC  
CTGCCCTCTGGGAGCACCGGCCTGCCTAATGGACTGCTGTCTGGCGACGAGGACTTCAGCTCTATCGCCGATATGGATTTCTCAGCCTTGCTGG  
GCTCTGGCAGCGGCAGCCGGGATTCCAGGGAAGGGATGTTTTTCCGAAAGCCTGAGGCCGGCTCCGCTATTAGTGACGTGTTTGAGGGCCGCGA  
GGTGTGCCAGCCAAAACGAATCCGGCCATTTATCCTCCAGGAAGTCCATGGGCCAACCGCCCACTCCCCGCCAGCCTCGCACCAACACCAACCGG  
TCCAGTACATGAGCCAGTCGGGTCACTGACCCCGCACCAAGTCCCTCAGCCACTGGATCCAGCGCCCGCAGTGACTCCCGAGGCCAGTACCTGTT  
GGAGGATCCCGATGAAGAGACGAGCCAGGCTGTCAAAGCCCTTCGGGAGATGGCCGATACTGTGATTCCCCAGAAGGAAGAGGCTGCAATCTGT  
GGCAAATGGACCTTTCCATCCGCCCCAAGGGGCCATCTGGATGAGCTGACAACCACACTTGAGTCCATGACCGAGGATCTGAACCTGGACTCA  
CCCCTGACCCCGGAATTGAACGAGATTCTGGATACCTTCTGAACGACGAGTGCCTCTTGCATGCCATGCATATCAGCACAGGACTGTCCATCTTCG  
ACACATCTCTGTTTAA

**BPK1520 (pU6-BsmBICassette-S.pyogenes.sgRNA-U6 Terminator)**

NNNN U6 Promoter

NNNN BsmBI Restriction Sites

NNNN *S. pyogenes* sgRNA

NNNN U6 Terminator

TGTACAAAAAGCAGGCTTTAAAGGAACCAATTCAGTCGACTGGATCCGGTACCAAGGTCGGGCAGGAAGAGGGCCTATTTCCCATGATTCCTTCA  
TATTTGCATATACGATACAAGGCTGTTAGAGAGATAATTAGAATTAATTTGACTGTAACACAAAGATATTAGTACAAAATACGTGACGTAGAAAAG  
TAATAATTTCTTGGGTAGTTTGCAGTTTTAAAATTATGTTTTAAAATGGACTATCATATGCTTACCGTAACTTGAAAGTATTTGATTTCTTGGCTTTA  
TATATCTTGTGGAAAGGACGAAACACCGGAGACGATTAATGCGTCTCCGTTTTAGAGCTAGAAAATAGCAAGTTAAAATAAGGCTAGTCCGTTATCA  
ACTTGAAAAAGTGGCACCGAGTCGGTGCTTTTTTTT

**JG1211: CAG-human dLbCpf1(D832A)-NLS-3xHA-VPR**

Human codon optimized dLbCpf1: **bold**, NLS: italic, 3xHA: lower case, VPR: lower case and **bold**

ATGAGCAAGCTGGAGAAGTTTACAACTGCTACTCCCTGTCTAAGACCCTGAGGTTCAAGGCCATCCCTGTGGGCAAGACCCAGGAGAACATCG  
ACAATAAGCGGCTGCTGGTGGAGGACGAGAAGAGAGCCGAGGATTATAAGGGCGTGAAGAAGCTGCTGGATCGCTACTATCTGTCTTTTATCA  
ACGACGTGCTGCACAGCATCAAGCTGAAGAATCTGAACAATTACATCAGCCTGTTCCGGAAGAAAACCAGAACCGAGAAGGAGAATAAGGAG  
CTGGAGAACCTGGAGATCAATCTGCGGAAGGAGATCGCCAAGGCCTTCAAGGGCAACGAGGGCTACAAGTCCCTGTTTAAAGAAGGATATCATC  
GAGACAATCCTGCCAGAGTTCTGGACGATAAGGACGAGATCGCCCTGGTGAACAGCTTCAATGGCTTTACCACAGCCTTCACCGGCTTCTTTGA  
TAACAGAGAGAATATGTTTTCCGAGGAGGCCAAGAGCACATCCATCGCCTTCAGGTGTATCAACGAGAATCTGACCCGCTACATCTCTAATATG  
GACATCTTCGAGAAGGTGGACGCCATCTTTGATAAGCACGAGGTGCAGGAGATCAAGGAGAAGATCCTGAACAGCGACTATGATGTGGAGGA  
TTTCTTTGAGGGCGAGTTCTTTAACTTTGTGCTGACACAGGAGGGCATCGACGTGTATAACGCCATCATCGGCGGCTTCGTGACCGAGAGCGGC  
GAGAAGATCAAGGGCCTGAACGAGTACATCAACCTGTATAATCAGAAAACCAAGCAGAAGCTGCCTAAGTTTAAAGCCACTGTATAAGCAGGTG  
CTGAGCGATCGGGAGTCTCTGAGCTTCTACGGCGAGGGCTATACATCCGATGAGGAGGTGCTGGAGGTGTTTAGAAACACCCTGAACAAGAAC  
AGCGAGATCTCAGCTCCATCAAGAAGCTGGAGAAGCTGTTCAAGAATTTTGACGAGTACTCTAGCGCCGGCATCTTTGTGAAGAACGGCCCCG  
CCATCAGCACAATCTCCAAGGATATCTTCGGCGAGTGGAACGTGATCCGGGACAAGTGGAATGCCGAGTATGACGATATCCACCTGAAGAAGA  
AGGCCGTGGTGACCGAGAAGTACGAGGACGATCGGAGAAAGTCCCTCAAGAAGATCGGCTCCTTTTCTCTGGAGCAGCTGCAGGAGTACGCCG  
ACGCCGATCTGTCTGTGGTGGAGAAGCTGAAGGAGATCATCATCCAGAAGGTGGATGAGATCTACAAGGTGTATGGCTCCTCTGAGAAGCTGT  
TCGACGCCGATTTTGTGCTGGAGAAGAGCCTGAAGAAGAACGACGCCGTGGTGGCCATCATGAAGGACCTGCTGGATTCTGTGAAGAGCTTCG  
AGAATTACATCAAGGCCTTCTTTGGCGAGGGCAAGGAGACAAACAGGGACGAGTCCTTCTATGGCGATTTTGTGCTGGCCTACGACATCCTGCT  
GAAGGTGGACCACATCTACGATGCCATCCGCAATTATGTGACCCAGAAGCCCTACTCTAAGGATAAGTTCAAGCTGTATTTTTCAGAACCCCTCAGT  
TCATGGGCGGCTGGGACAAGGATAAGGAGACAGACTATCGGGCCACCATCCTGAGATACGGCTCCAAGTACTATCTGGCCATCATGGATAAGA

AGTACGCCAAGTGCCTGCAGAAGATCGACAAGGACGATGTGAACGGCAATTACGAGAAGATCAACTATAAGCTGCTGCCCGGCCCTAATAAGA  
TGCTGCCAAAGGTGTTCTTTTCTAAGAAGTGGATGGCCTACTATAACCCCAGCGAGGACATCCAGAAGATCTACAAGAATGGCACATTCAAGAA  
GGCGATATGTTAACCTGAATGACTGTCACAAGCTGATCGACTTCTTTAAGGATAGCATCTCCCGGTATCCAAAGTGGTCCAATGCCTACGATT  
TCAACTTTTCTGAGACAGAGAAGTATAAAGGACATCGCCGGCTTTTACAGAGAGGTGGAGGAGCAGGGCTATAAAGGTGAGCTTCGAGTCTGCCA  
GCAAGAAGGAGGTGGATAAGCTGGTGGAGGAGGGCAAGCTGTATATGTTCCAGATCTATAACAAGGACTTTTCCGATAAGTCTCACGGCACAC  
CCAATCTGCACACCATGTACTTCAAGCTGCTGTTTGACGAGAACAATCACGGACAGATCAGGCTGAGCGGAGGAGCAGAGCTGTTTCATGAGGC  
GCGCCTCCCTGAAGAAGGAGGAGCTGGTGGTGCACCCAGCCAACCTCCCTATCGCCAACAAGAATCCAGATAATCCCAAGAAAACCACAACCT  
GTCCTACGACGTGTATAAAGGATAAGAGGTTTTCTGAGGACCAGTACGAGCTGCACATCCCAATCGCCATCAATAAGTGCCCCAAGAACATCTTCA  
AGATCAATACAGAGGTGCGCGTGTGCTGAAGCACGACGATAAACCCCTATGTGATCGGCATCGCCAGGGGCGAGCGCAATCTGCTGTATATCGT  
GGTGGTGGACGGCAAGGGCAACATCGTGGAGCAGTATCCCTGAACGAGATCATCAACAACCTTCAACGGCATCAGGATCAAGACAGATTACCA  
CTCTCTGCTGGACAAGAAGGAGAAGGAGAGGTTTCGAGGCCCGCCAGAAGTGGACCTCCATCGAGAATATCAAGGAGCTGAAGGCCGGCTATAT  
CTCTCAGGTGGTGCACAAGATCTGCGAGCTGGTGGAGAAGTACGATGCCGTGATCGCCCTGGAGGACCTGAACTCTGGCTTTAAGAATAGCCGC  
GTGAAGGTGGAGAAGCAGGTGTATCAGAAGTTCGAGAAGATGCTGATCGATAAGCTGAACTACATGGTGGACAAGAAGTCTAATCCTTGTGCA  
ACAGGCGGCGCCCTGAAGGGCTATCAGATCACCAATAAGTTCGAGAGCTTTAAGTCCATGTCTACCCAGAACGGCTTCATCTTTTACATCCCTGC  
CTGGCTGACATCCAAGATCGATCCATCTACCGCTTTGTGAACCTGCTGAAAACCAAGTATACCAGCATCGCCGATTCCAAGAAGTTCATCAGCT  
CCTTTGACAGGATCATGTACGTGCCCAGGAGGATCTGTTTCGAGTTTGCCTGGACTATAAGAAGTCTCTCGCACAGACGCCGATTACATCAAG  
AAGTGGAAAGCTGTACTCCTACGGCAACCGGATCAGAATCTCCGGAATCCTAAGAAGAACAACGTGTTTCGACTGGGAGGAGGTGTGCCTGACC  
AGCGCCTATAAAGGAGCTGTTCAACAAGTACGGCATCAATTATCAGCAGGGCGATATCAGAGCCCTGCTGTGCGAGCAGTCCGACAAGGCCTTCT  
ACTTAGCTTTATGGCCCTGATGAGCCTGATGCTGCAGATGCGGAACAGCATCACAGGCCGACCCGACGTGGATTTTCTGATCAGCCCTGTGAAG  
AACTCCGACGGCATCTTCTACGATAGCCGGAAGTATGAGGCCAGGAGAATGCCATCCTGCCAAAGAACGCCGACGCCAATGGCGCCTATAACA  
TCGCCAGAAAGGTGCTGTGGGCCATCGGCCAGTTCAAGAAGGCCGAGGACGAGAAGCTGGATAAGGTGAAGATCGCCATCTCTAACAAGGAG  
TGGCTGGAGTACGCCAGACAGCGTGAAGCACAAAAGGCCGGCGGCCACGAAAAAGGCCGGCCAGGCAAAAAAGAAAAAGGGATCCtaccata  
cgatgttccagattacgcttatccctacgacgtgctgattatgcatacccatatgatgtccccgactatgccGAAGCgaggccagcggttccggacgggctgacgcattggacgattttgat  
ctggatatgctgggaagtgacgccctcgatgattttgaccttgacatgcttggttcggatgcccttgatgactttgacctgacatgctcggcagtgacgcccttgatgatttcgacctggacatg  
ctgattaactctagaagttccggatctccgaaaaagaaacgcaaagttggtagccagtacctgcccacaccgacgaccggcaccggatcaggaaaagcgggaagcggacctacgagaca  
ttcaagagcatcatgaagaagtcccccttcagcggccccaccgacctagacctccacctagaagaatcgccgtgcccagcagatccagcggcagcgtgccaacctgccccccagcctac  
cccttcaccagcagcctgagcaccatcaactacgacgagttccctaccatgggtgttccccagcggccagatctctcaggcctctgctctggctccagcccctcctcaggtgctgctcaggctcct  
gctcctgaccagctccagccatggtgtctgactggctcaggcaccagcaccgtgctgtgctggctcctggacctccacaggctgtggctccaccagcccctaaacctacacaggccggcg  
agggcacactgtctgaagctctgctgacgtgagttcgacgacgaggatctgggagccctgctgggaaacagcaccgatctgcccgtgtcaccgacctggccagcgtggacaacagcgag  
ttccagcagctgctgaaccagggcatccctgtggcccctcacaccaccgagccatgctgatggaataccccgaggccatccccggctcgtgacaggcgctcagaggcctcctgatccagctc  
ctgcccctctgggagcaccaggcctgctaattggactgctgtctggcgacgaggacttcagctctatcgccgataggatttctcagccttgctgggctctggcagcggcagccgggattccagg

gaagggatgtttttgccgaagcctgaggccggctccgctattagtgacgtgtttgagggccgaggtgtgccagcaaaacgaatccggccatttcacctccaggaagtccatgggccaac  
cgcccactccccgccagcctcgaccaacaccaaccgggtccagtacatgagccagtcgggtcactgacccccgccaccagtcctcagccactggatccagcgcgccgagtgactcccaggcc  
agtcaacctgttgaggatcccgatgaagagacgagccaggctgtcaaagcccttcgggagatggccgatactgtgattcccagaaggaagaggctgcaatctgtggccaaatggaccttc  
ccatccgcccccaaggggcatctggatgagctgacaaccacacttgagtcctgaccgaggatctgaacctggactaccccctgacccccggaattgaacgagattctggataccttctgaa  
cgacgagtgctcttgcatgcatatcagcacaggactgtccatcttcgacacatctctgTTT

**YET1000: CAG-human dLbCpf1(D832A)-NLS-3xHA-DmrA(X4)**

Human codon optimized dLbCpf1: **bold**, NLS: *italic*, 3xHA: lower case, DmrA: lowercase and **bold**

ATGAGCAAGCTGGAGAAGTTTACAACTGCTACTCCCTGTCTAAGACCCTGAGGTTCAAGGCCATCCCTGTGGGCAAGACCCAGGAGAACATCG  
ACAATAAGCGGCTGCTGGTGGAGGACGAGAAGAGAGCCGAGGATTATAAGGGCGTGAAGAAGCTGCTGGATCGCTACTATCTGTCTTTTATCA  
ACGACGTGCTGCACAGCATCAAGCTGAAGAATCTGAACAATTACATCAGCCTGTTCCGGAAGAAAACCAGAACCGAGAAGGAGAATAAGGAG  
CTGGAGAACCTGGAGATCAATCTGCGAAGGAGATCGCCAAGGCCCTCAAGGGCAACGAGGGCTACAAGTCCCTGTTTAAAGAAGGATATCATC  
GAGACAATCCTGCCAGAGTTCCTGGACGATAAGGACGAGATCGCCCTGGTGAACAGCTTCAATGGCTTTACCACAGCCTTCACGGCTTCTTTGA  
TAACAGAGAGAATATGTTTTCCGAGGAGGCCAAGAGCACATCCATCGCCTTCAGGTGTATCAACGAGAATCTGACCCGCTACATCTCTAATATG  
GACATCTTCGAGAAGGTGGACGCCATCTTTGATAAGCACGAGGTGCAGGAGATCAAGGAGAAGATCCTGAACAGCGACTATGATGTGGAGGA  
TTTTTTGAGGGCGAGTTCTTTAACTTTGTGCTGACACAGGAGGGCATCGACGTGTATAACGCCATCATCGGCGGCTTCGTGACCGAGAGCGGC  
GAGAAGATCAAGGGCCTGAACGAGTACATCAACCTGTATAATCAGAAAACCAAGCAGAAGCTGCCTAAGTTTAAAGCCACTGTATAAGCAGGTG  
CTGAGCGATCGGGAGTCTCTGAGCTTCTACGGCGAGGGCTATACATCCGATGAGGAGGTGCTGGAGGTGTTTAGAAACACCCTGAACAAGAAC  
AGCGAGATCTCAGCTCCATCAAGAAGCTGGAGAAGCTGTTCAAGAATTTTGACGAGTACTCTAGCGCCGGCATCTTTGTGAAGAACGGCCCCG  
CCATCAGCACAACTCCAAGGATATCTTCGGCGAGTGGAACGTGATCCGGGACAAGTGGAATGCCGAGTATGACGATATCCACCTGAAGAAGA  
AGGCCGTGGTGACCGAGAAGTACGAGGACGATCGGAGAAAGTCCTTCAAGAAGATCGGCTCCTTTTCTCTGGAGCAGCTGCAGGAGTACGCCG  
ACGCCGATCTGTCTGTGGTGGAGAAGCTGAAGGAGATCATCATCCAGAAGGTGGATGAGATCTACAAGGTGTATGGCTCCTCTGAGAAGCTGT  
TCGACGCCGATTTTGTGCTGGAGAAGAGCCTGAAGAAGAACGACGCCGTGGTGGCCATCATGAAGGACCTGCTGGATTCTGTGAAGAGCTTCG  
AGAATTACATCAAGGCCTTCTTTGGCGAGGGCAAGGAGACAAACAGGGACGAGTCCTTCTATGGCGATTTTGTGCTGGCCTACGACATCCTGCT  
GAAGGTGGACCACATCTACGATGCCATCCGCAATTATGTGACCCAGAAGCCCTACTCTAAGGATAAGTTCAAGCTGTATTTTCAAGACCCTCAGT  
TCATGGGCGGCTGGGACAAGGATAAGGAGACAGACTATCGGGCCACCATCCTGAGATACGGCTCCAAGTACTATCTGGCCATCATGGATAAGA  
AGTACGCCAAGTGCCTGCAGAAGATCGACAAGGACGATGTGAACGGCAATTACGAGAAGATCAACTATAAGCTGCTGCCCAGCCCTAATAAGA  
TGCTGCCAAAGGTGTTCTTTTCTAAGAAGTGGATGGCCTACTATAACCCAGCGAGGACATCCAGAAGATCTACAAGAATGGCACATTCAAGAA  
GGGCGATATGTTTAACTGAATGACTGTCAAGCTGATCGACTTCTTTAAGGATAGCATCTCCCGGTATCCAAGTGGTCCAATGCCTACGATT  
TCAACTTTTCTGAGACAGAGAAGTATAAGGACATCGCCGGCTTTTACAGAGAGGTGGAGGAGCAGGGCTATAAGGTGAGCTTCGAGTCTGCCA  
GCAAGAAGGAGGTGGATAAGCTGGTGGAGGAGGGCAAGCTGTATATGTTCCAGATCTATAACAAGGACTTTTCCGATAAGTCTCACGGCACAC

CCAATCTGCACACCATGTACTTCAAGCTGCTGTTTGACGAGAACAATCACGGACAGATCAGGCTGAGCGGAGGAGCAGAGCTGTTTCATGAGGC  
GCGCCTCCCTGAAGAAGGAGGAGCTGGTGGTGCACCCAGCCAACCTCCCCTATCGCCAACAAGAATCCAGATAATCCCAAGAAAACCAACCCCT  
GTCCTACGACGTGTATAAGGATAAGAGGTTTTCTGAGGACCAGTACGAGCTGCACATCCCAATCGCCATCAATAAGTGCCCCAAGAACATCTTCA  
AGATCAATACAGAGGTGCGCGTGCTGCTGAAGCACGACGATAAACCCTATGTGATCGGCATCGCCAGGGGCGAGCGCAATCTGCTGTATATCGT  
GGTGGTGGACGGCAAGGGCAACATCGTGGAGCAGTATTCCCTGAACGAGATCATCAACAACCTCAACGGCATCAGGATCAAGACAGATTACCA  
CTCTCTGCTGGACAAGAAGGAGAAGGAGAGGTTTCGAGGCCCGCCAGAACTGGACCTCCATCGAGAATATCAAGGAGCTGAAGGCCGGCTATAT  
CTCTCAGGTGGTGCACAAGATCTGCGAGCTGGTGGAGAAGTACGATGCCGTGATCGCCCTGGAGGACCTGAACTCTGGCTTTAAGAATAGCCGC  
GTGAAGGTGGAGAAGCAGGTGTATCAGAAGTTCGAGAAGATGCTGATCGATAAGCTGAACTACATGGTGGACAAGAAGTCTAATCCTTGTGCA  
ACAGGCCGCGCCCTGAAGGGCTATCAGATCACCAATAAGTTTCGAGAGCTTTAAGTCCATGTCTACCCAGAACGGCTTCATCTTTTACATCCCTGC  
CTGGCTGACATCCAAGATCGATCCATCTACCGCTTTGTGAACCTGCTGAAAACCAAGTATAACCAGCATCGCCGATTCCAAGAAGTTCATCAGCT  
CCTTTGACAGGATCATGTACGTGCCGAGGAGGATCTGTTTCGAGTTTGCCTGGACTATAAGAACTTCTCTCGCACAGACGCCGATTACATCAAG  
AAGTGGAAAGCTGTACTCTACGGCAACCGGATCAGAATCTCCGGAATCCTAAGAAGAACAACGTGTTTCGACTGGGAGGAGGTGTGCCTGACC  
AGCGCCTATAAGGAGCTGTTCAACAAGTACGGCATCAATTATCAGCAGGGCGATATCAGAGCCCTGCTGTGCGAGCAGTCCGACAAGGCCTTCT  
ACTTAGCTTTATGGCCCTGATGAGCCTGATGCTGCAGATGCGGAACAGCATCACAGGCCGCACCGACGTGGATTTTCTGATCAGCCCTGTGAAG  
AACTCCGACGGCATCTTCTACGATAGCCGGAACCTATGAGGCCAGGAGAATGCCATCCTGCCAAAGAACGCCGACGCCAATGGCGCCTATAACA  
TCGCCAGAAAGGTGCTGTGGGCCATCGGCCAGTTCAAGAAGGCCGAGGACGAGAAGCTGGATAAGGTGAAGATCGCCATCTCTAACAAGGAG  
TGGCTGGAGTACGCCCAGACCAGCGTGAAGCACAAAAGGCCGGCGGCCACGAAAAAGGCCGGCCAGGCAAAAAAGAAAAAGGGATCCtaccata  
cgatgttccagattacgcttatccctacgacgtgcctgattatgcatacccatatgatgtccccgactatgccTCGAGCGACTACAAAGACCATGACGGTGATTATAAAGATCA  
TGACATCGATTACAAGGATGACGATGACAAGGCTGCAGGAGGCGGTGGAAGCGGGGAaggggagtgcaggtggaaaccatctccccaggagacggggcacc  
ttcccaagcgcggccagacctgcgtgggtgcactacaccgggatgcttgaagatggaaagaaatttgattcctcccgggacagaaacaagcccttaagttatgctaggcaagcaggaggt  
gatccgaggctgggaagaaggggttcccagatgagtgtgggtcagagagccaaactgactatatctccagattatgcctatggtgccactgggacccaggcatcatcccaccacatgcc  
ctctcgtcttcgatgtggagcttctaaaactggaaGGTTCTaggggagtgcaggtggaaaccatctcccaggagacggggcacccttcccaagcgcggccagacctgcgtgggtgcacta  
caccgggatgcttgaagatggaaagaaatttgattcctcccgggacagaaacaagcccttaagttatgctaggcaagcaggaggtgatccgaggctgggaagaaggggttcccagatg  
agtgtgggtcagagagccaaactgactatatctccagattatgcctatggtgccactgggacccaggcatcatcccaccacatgccactctcgtcttcgatgtggagcttctaaaactggaaG  
GGGAAGCGGTGGAAGCGGGaggggagtgcaggtggaaaccatctcccaggagacggggcacccttcccaagcgcggccagacctgcgtgggtgcactacaccgggatgctt  
aagatggaaagaaatttgattcctcccgggacagaaacaagcccttaagttatgctaggcaagcaggaggtgatccgaggctgggaagaaggggttcccagatgagtgtgggtcagag  
agccaaactgactatatctccagattatgcctatggtgccactgggacccaggcatcatcccaccacatgccactctcgtcttcgatgtggagcttctaaaactggaaGGTTCTaggggagt  
gcaggtggaaaccatctcccaggagacggggcacccttcccaagcgcggccagacctgcgtgggtgcactacaccgggatgcttgaagatggaaagaaatttgattcctcccgggacaga  
aacaagcccttaagttatgctaggcaagcaggaggtgatccgaggctgggaagaaggggttcccagatgagtgtgggtcagagagccaaactgactatatctccagattatgcctatgg  
tgccactgggacccaggcatcatcccaccacatgccactctcgtcttcgatgtggagcttctaaaactggaaGGATAA

## BPK3082: U6-Lb-crRNA-BsmBIcassette

U6 promoter: **bold**, Lb crRNA: *italic*, BsmBI sites: lower case, U6 terminator: *italic* and **bold**

**TGTACAAAAAAGCAGGCTTTAAAGGAACCAATTCAGTCGACTGGATCCGGTACCAAGGTCGGGCAGGAAGAGGGCCTATTTCCCATGATTCCTT  
CATATTTGCATATACGATACAAGGCTGTTAGAGAGATAATTAGAATTAATTTGACTGTAAACACAAAGATATTAGTACAAAATACGTGACGTAG  
AAAGTAATAATTTCTTGGGTAGTTTGCAGTTTTAAAATTATGTTTTAAAATGGACTATCATATGCTTACCGTAACTTGAAAGTATTTGATTCTTG  
GCTTTATATATCTTGTGGAAAGGACGAAACACCGAATTTCTACTAAGTG TAGATGgagacgATTAATGcgtctcTTTTTTT**

## REFERENCES

1. P. Perez-Pinera *et al.*, RNA-guided gene activation by CRISPR-Cas9-based transcription factors. *Nat Methods* **10**, 973-976 (2013).
2. E. A. Boyle *et al.*, High-throughput biochemical profiling reveals sequence determinants of dCas9 off-target binding and unbinding. *Proceedings of the National Academy of Sciences of the United States of America* **114**, 5461-5466 (2017).
3. C. A. Berkes, S. J. Tapscott, MyoD and the transcriptional control of myogenesis. *Seminars in cell & developmental biology* **16**, 585-595 (2005).
4. Y. E. Tak *et al.*, Inducible and multiplex gene regulation using CRISPR-Cpf1-based transcription factors. *Nat Methods* **14**, 1163-1166 (2017).
5. S. S. Rao *et al.*, A 3D map of the human genome at kilobase resolution reveals principles of chromatin looping. *Cell* **159**, 1665-1680 (2014).
6. Y. Wang *et al.*, SPIN reveals genome-wide landscape of nuclear compartmentalization. *Genome Biol* **22**, 36 (2021).
